# Supplementary material for: Solvothermal liquefaction of alkali lignin to obtain a high yield of aromatic monomers while suppressing solvent consumption
Source: Royal Society of Chemistry journal article supplement (doi:10.1039/c8gc02460j), 2018-01-01
Supplement: c8gc02460j1.pdf [file c8gc02460j1.pdf]

**Supporting Information**

**Solvothermal liquefaction of alkali lignin to high-yield  
aromatic monomers with suppressing solvent consumption**

Asim Riaz,<sup>a</sup> Deepak Verma,<sup>a</sup> Jeong Hyeon Lee,<sup>b</sup> Jin Chul Kim,<sup>b</sup> Sang Kyu Kwak,<sup>\*,b</sup> Jaehoon Kim<sup>\*,a,c,d</sup>

<sup>a</sup> School of Mechanical Engineering, Sungkyunkwan University,

2066 Seobu-Ro, Jangan-Gu, Suwon, Gyeong Gi-Do, 16419, Republic of Korea

<sup>b</sup> School of Energy and Chemical Engineering, Ulsan National Institute of Science and Technology, 50 Unist-gil, Ulsan 44919, Republic of Korea

<sup>c</sup> SKKU Advanced Institute of Nano Technology (SAINT), Sungkyunkwan University, 2066 Seobu-Ro, Jangan-Gu, Suwon, Gyeong Gi-Do, 16419, Republic of Korea

<sup>d</sup> School of Chemical Engineering, Sungkyunkwan University,

2066 Seobu-Ro, Jangan-Gu, Suwon, Gyeong Gi-Do, 16419, Republic of Korea

\*To whom correspondence should be addressed. e-mail: jaehoonkim@skku.edu (Prof. Jaehoon Kim), skkwak@unist.ac.kr (Prof. Sang Kyu Kwak)

**Table S1.** Yields of vanillin and syringaldehyde obtained from the nitrobenzene oxidation of Kraft lignin

| Sample        | Vanillin<br>(V)    | Syringaldehyde<br>(S) | V + S | S/G   | Total yield (wt%) |
|---------------|--------------------|-----------------------|-------|-------|-------------------|
|               | (μmol/g of Lignin) |                       |       |       |                   |
| Alkali lignin | 665                | 36                    | 701   | 0.053 | 10.8              |

### Monomer's quantification:

For the monomer quantification, 12 aromatic monomers (phenol, ethyl phenol, toluene, guaiacol, ethyl guaiacol, 4-propyl guaiacol, creosol, catechol, 4-ethyl catechol, 3 methyl catechol, 3-tert-butyl-hydroxyanisole, benzenepropanol,4-hydroxy-3-methoxy) and 9 linear/branched oxygenated hydrocarbons (butanol, propanoic acid ethyl ester, ethane,1,1-diethoxy, acetic acid butyl ester, butanoic acid ethyl ester, diethoxy methane, 2-buten-1-ol, ethyl acetate, 1-ethoxy butane) were purchased. The calibration curves for each model compound are shown below. To quantify commercially unavailable aromatic monomers (3-methoxy-6-methylphenol, 4-propylphenol, and homovanillyl alcohol), an effective carbon number (ECN) method was used. Guaiacol was used as a reference compound to calculate the concentration target compound by the ECN method, as proposed by Schofield.<sup>3, 4</sup> The formula used to quantify the chemical species is:

$$C_i = \frac{C_{ref}}{A_{ref}} \times A_i \times \frac{n_{eff,ref}}{n_{eff,i}}$$

where  $C_i$  and  $C_{ref}$  are the concentrations of target compound and the reference compound, respectively,  $A_i$  and  $A_{ref}$  are the GC peak areas of the target compound and reference compound, respectively, and  $n_{eff}$  is the ECN.

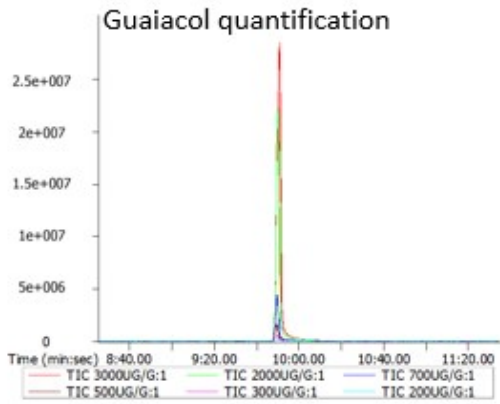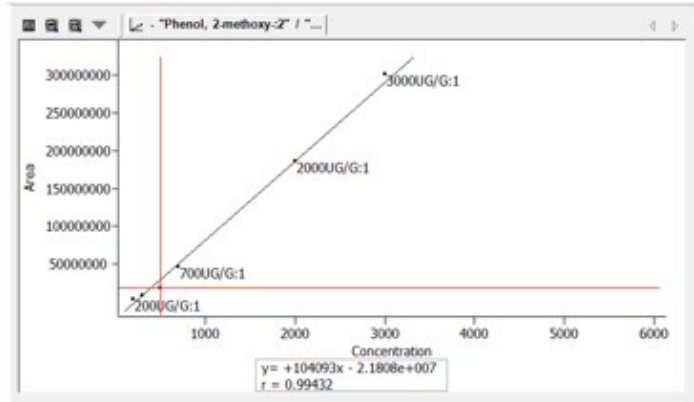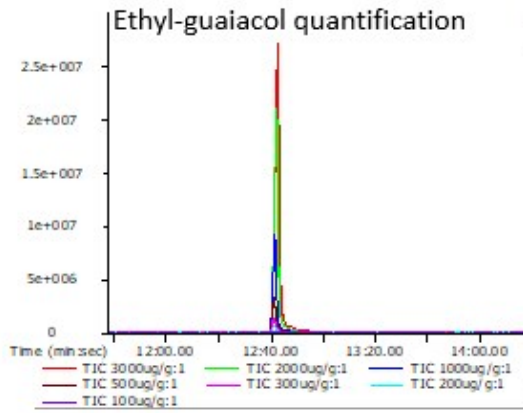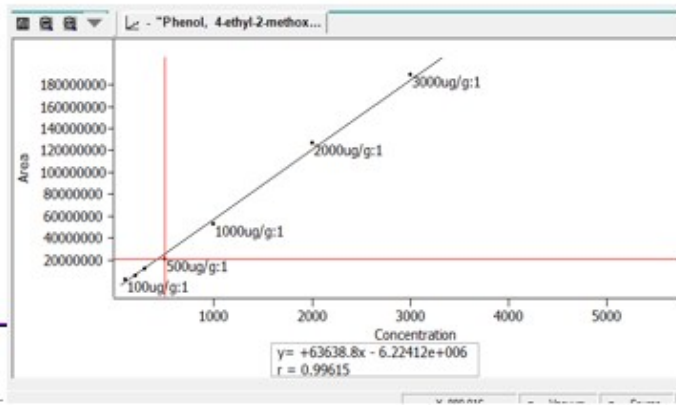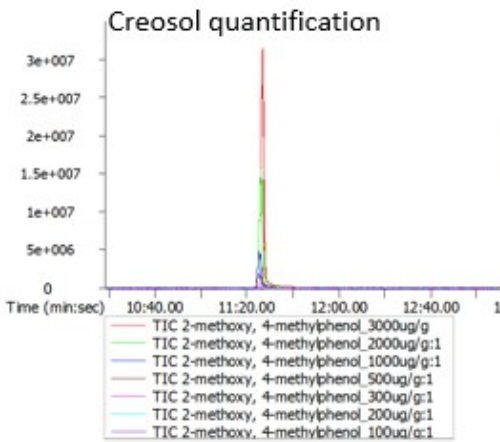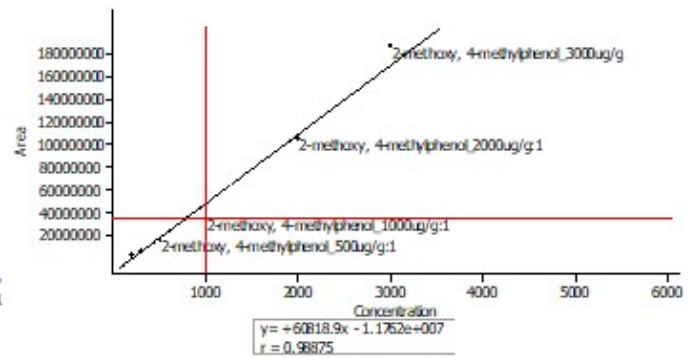

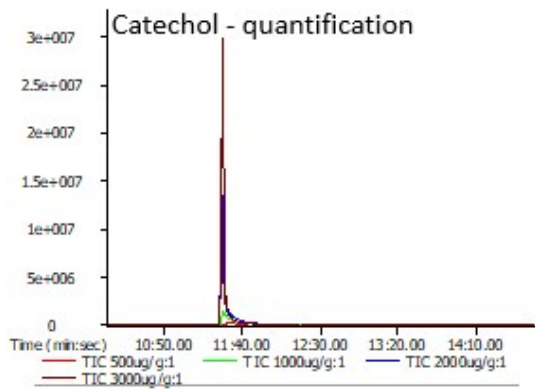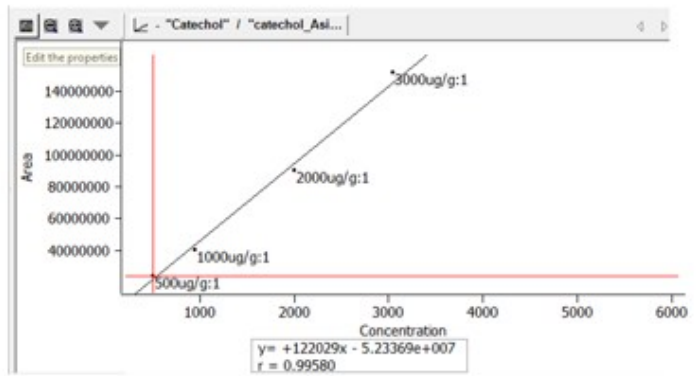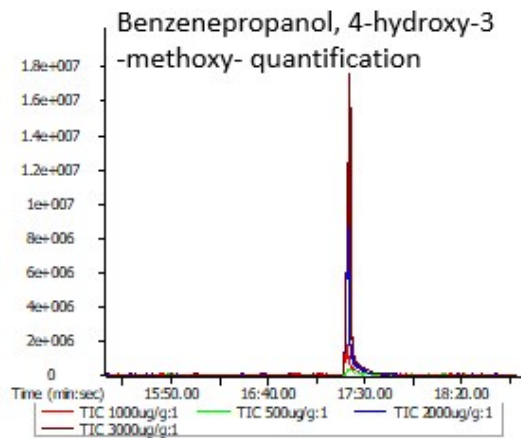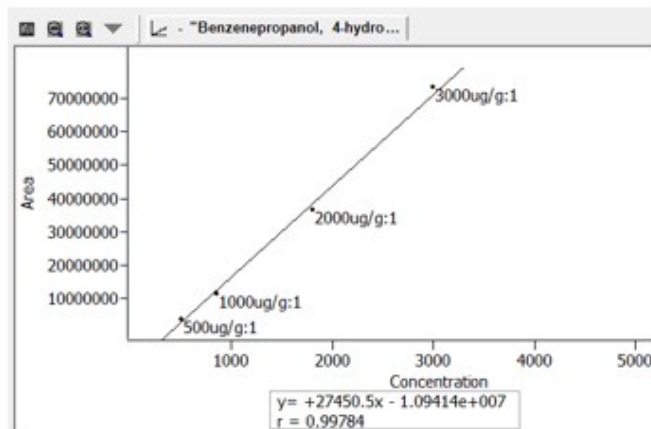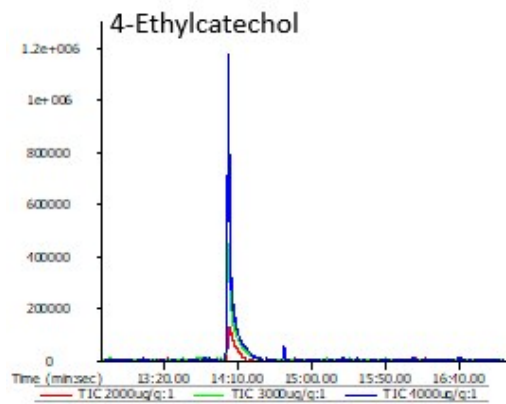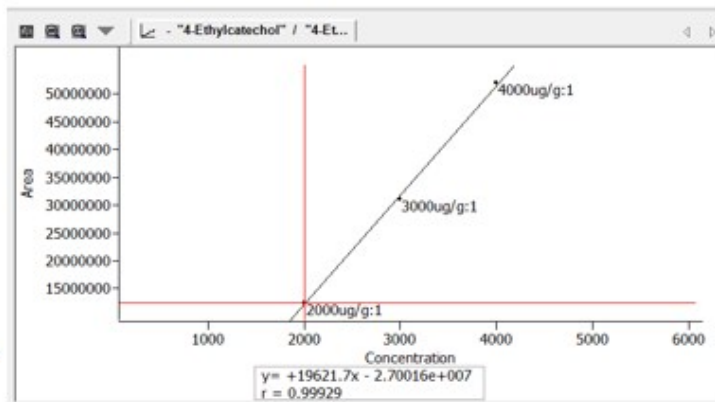

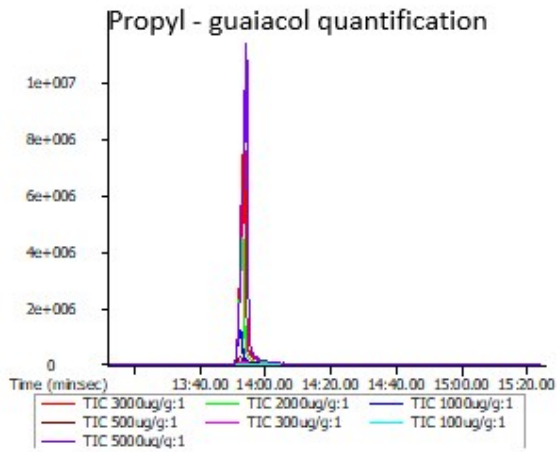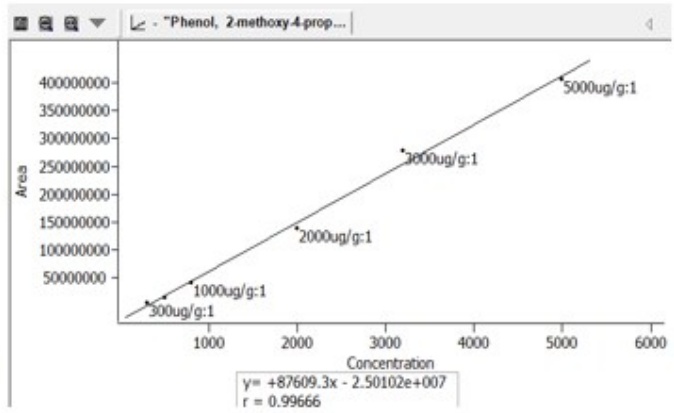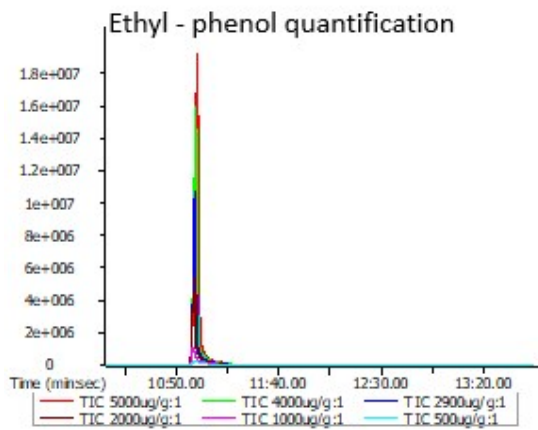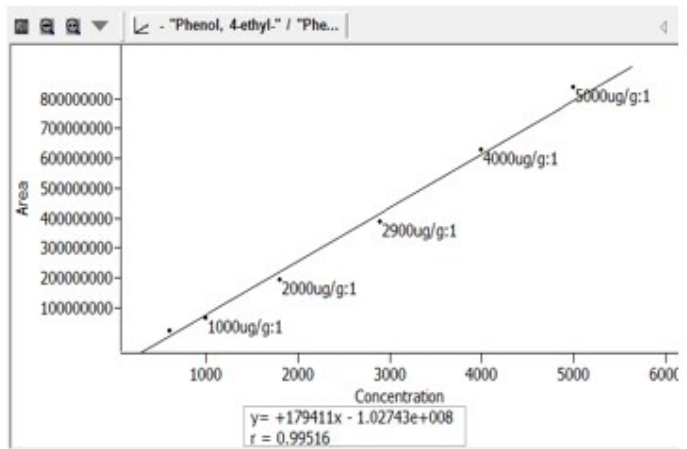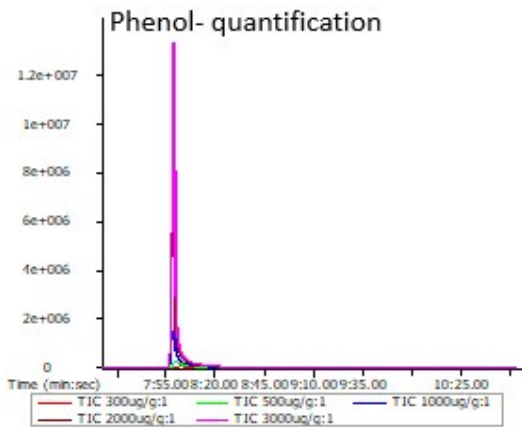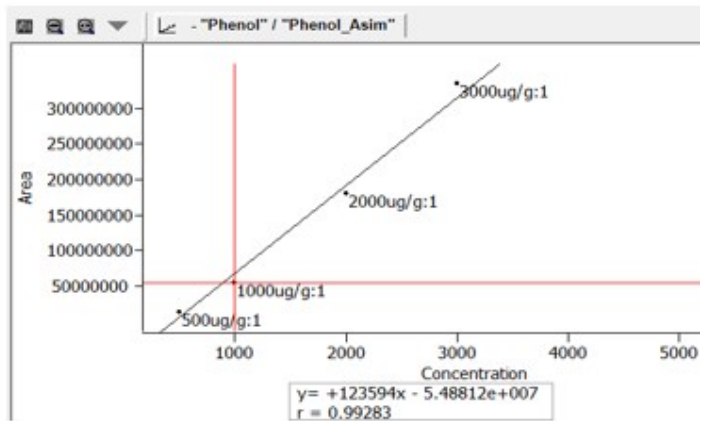

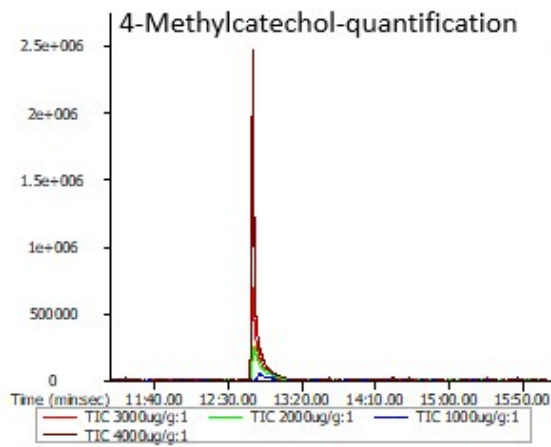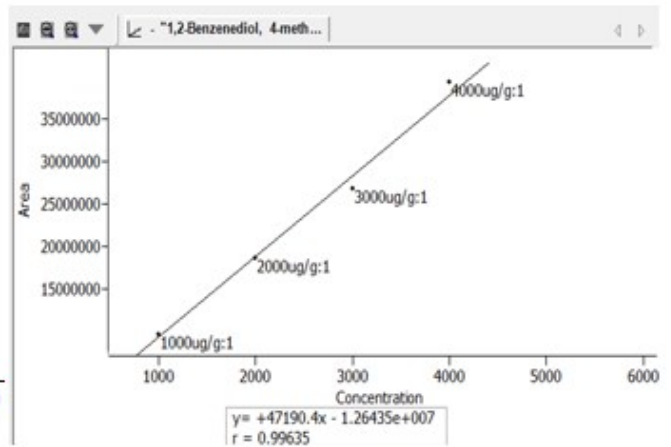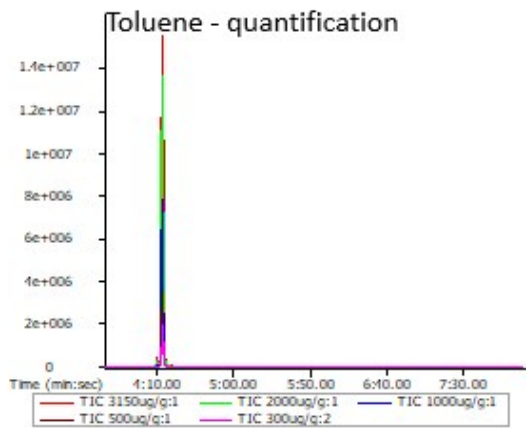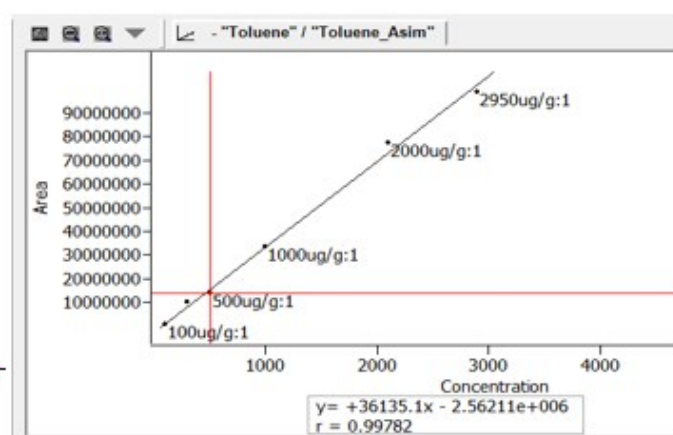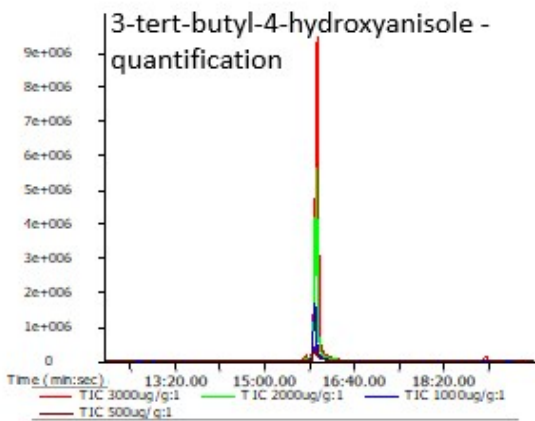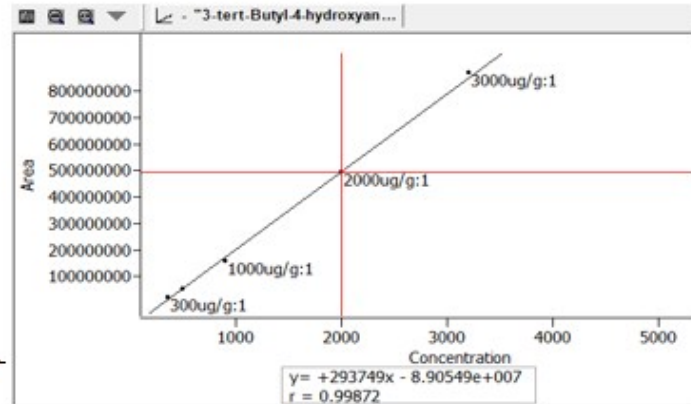

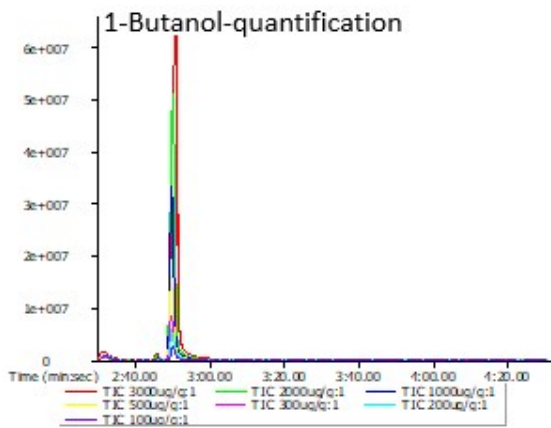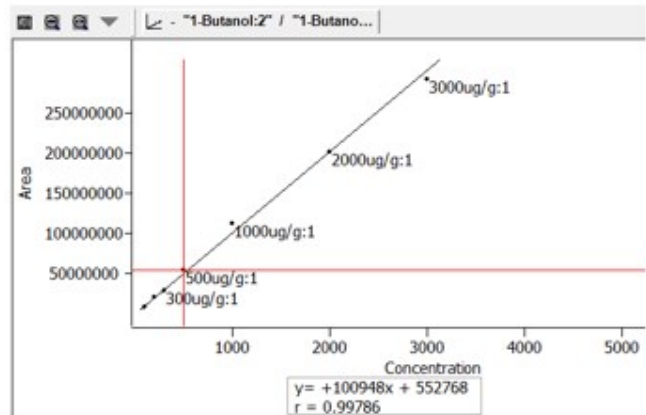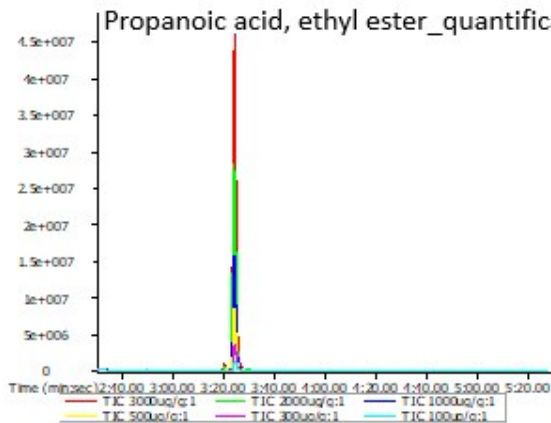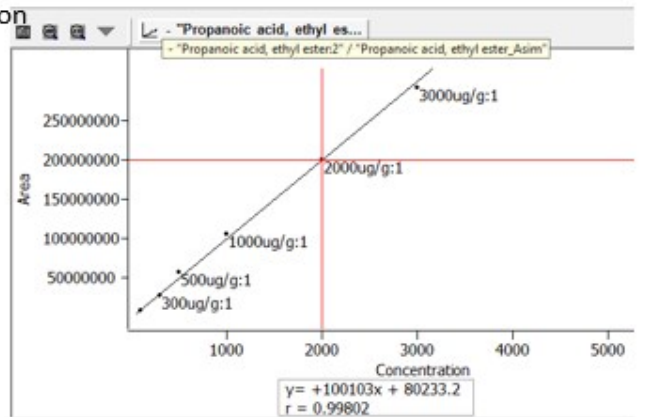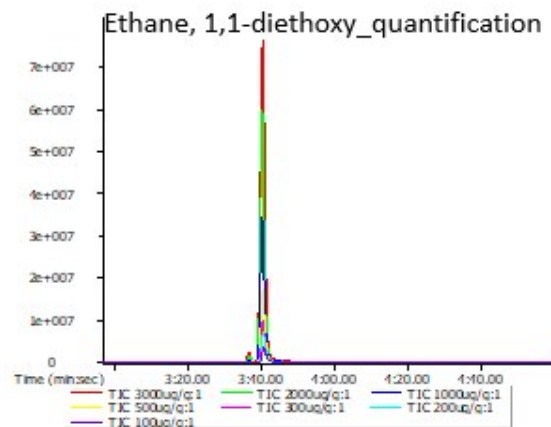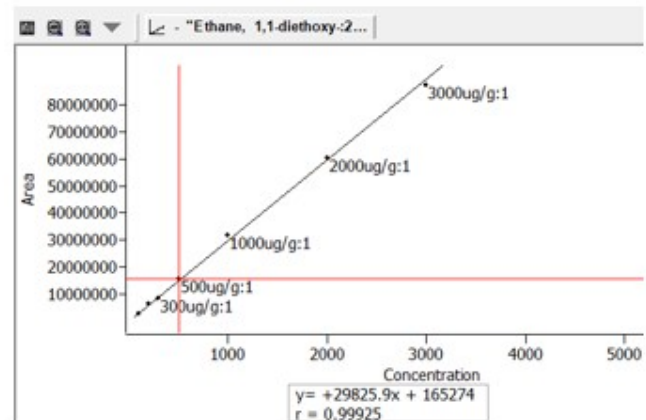



### Acetic acid, butyl ester\_quantification

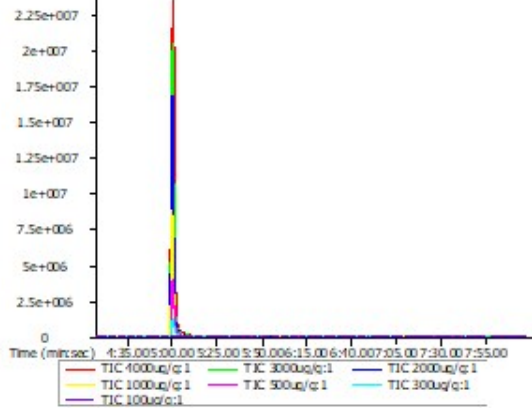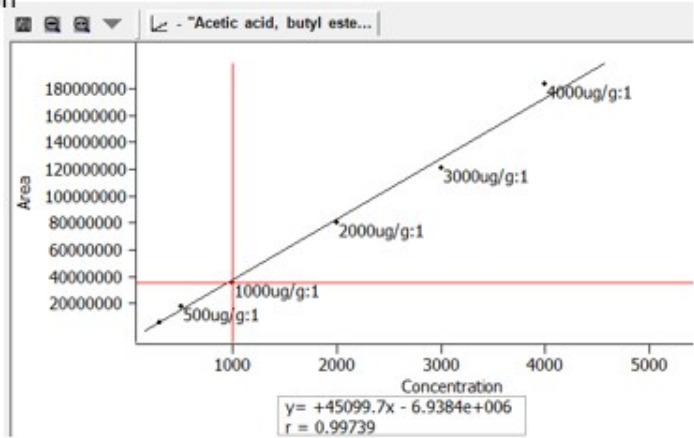

### Butanoic acid, ethyl ester\_quantification

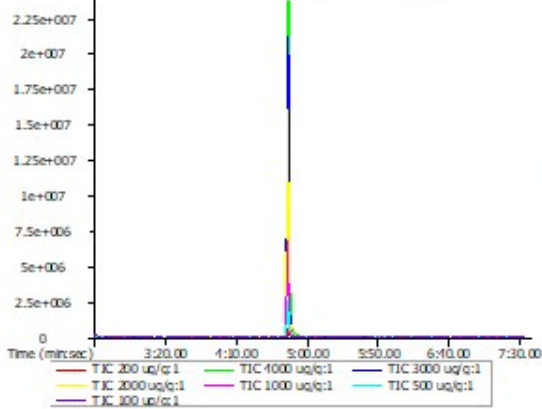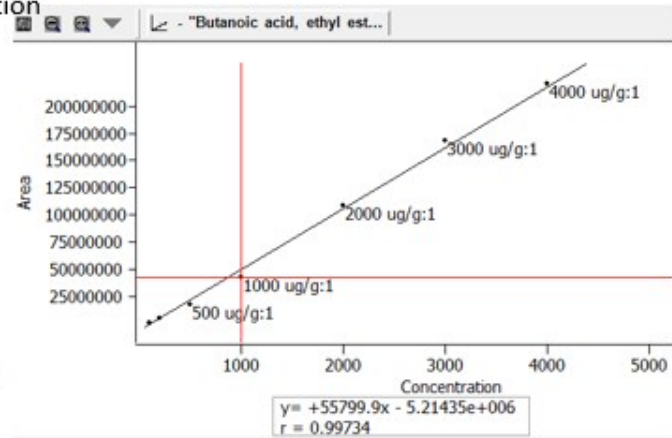

### Methane, diethoxy-\_quantification

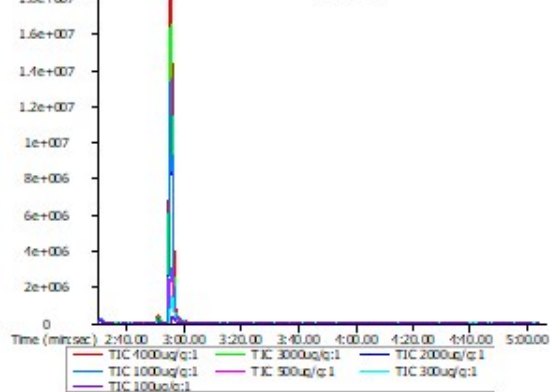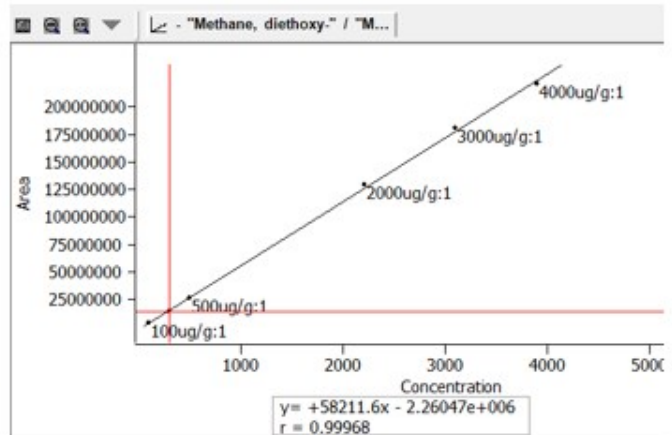

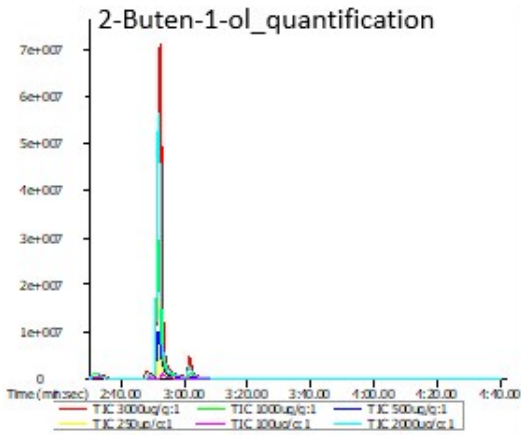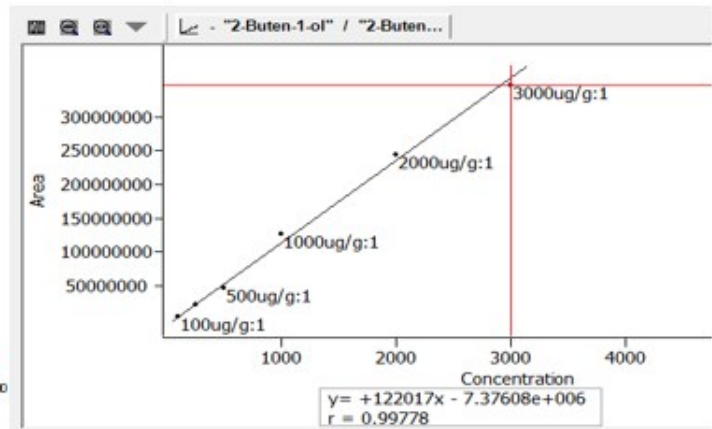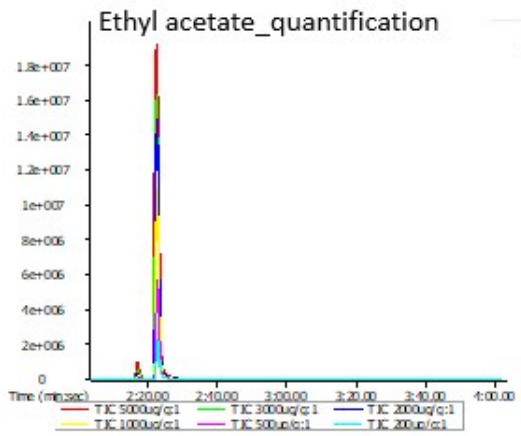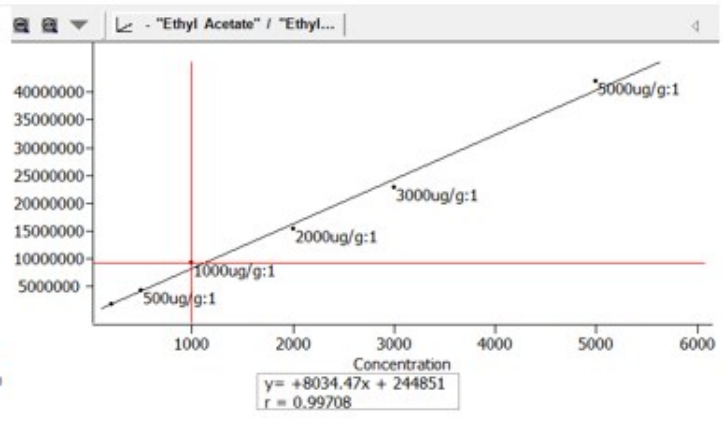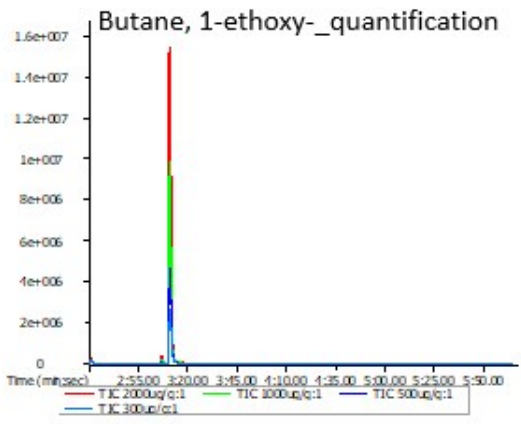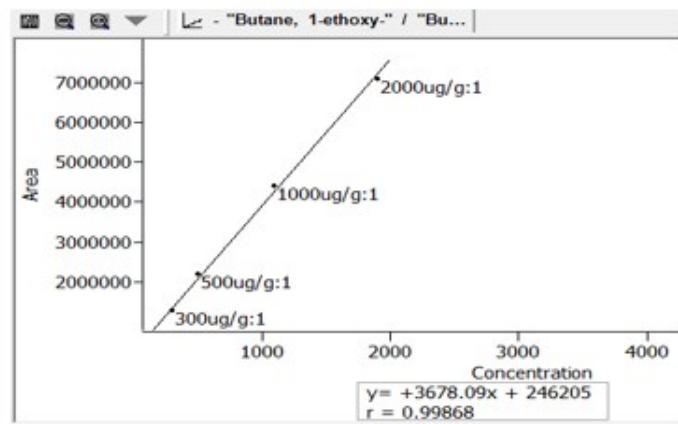

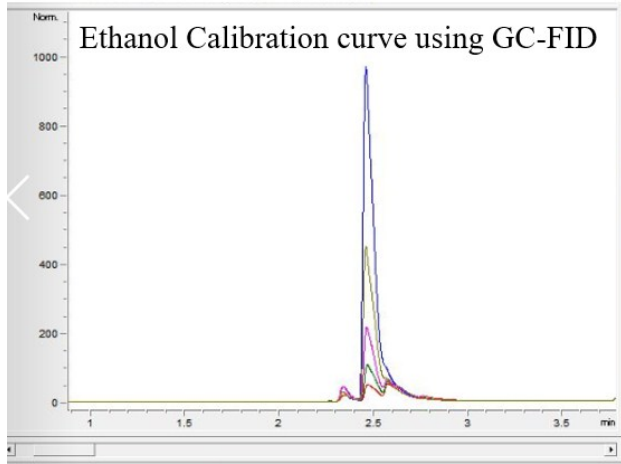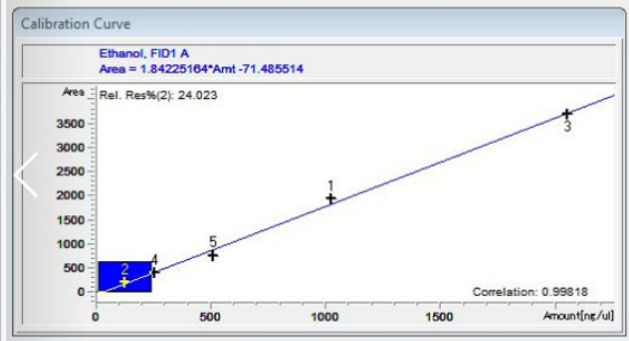

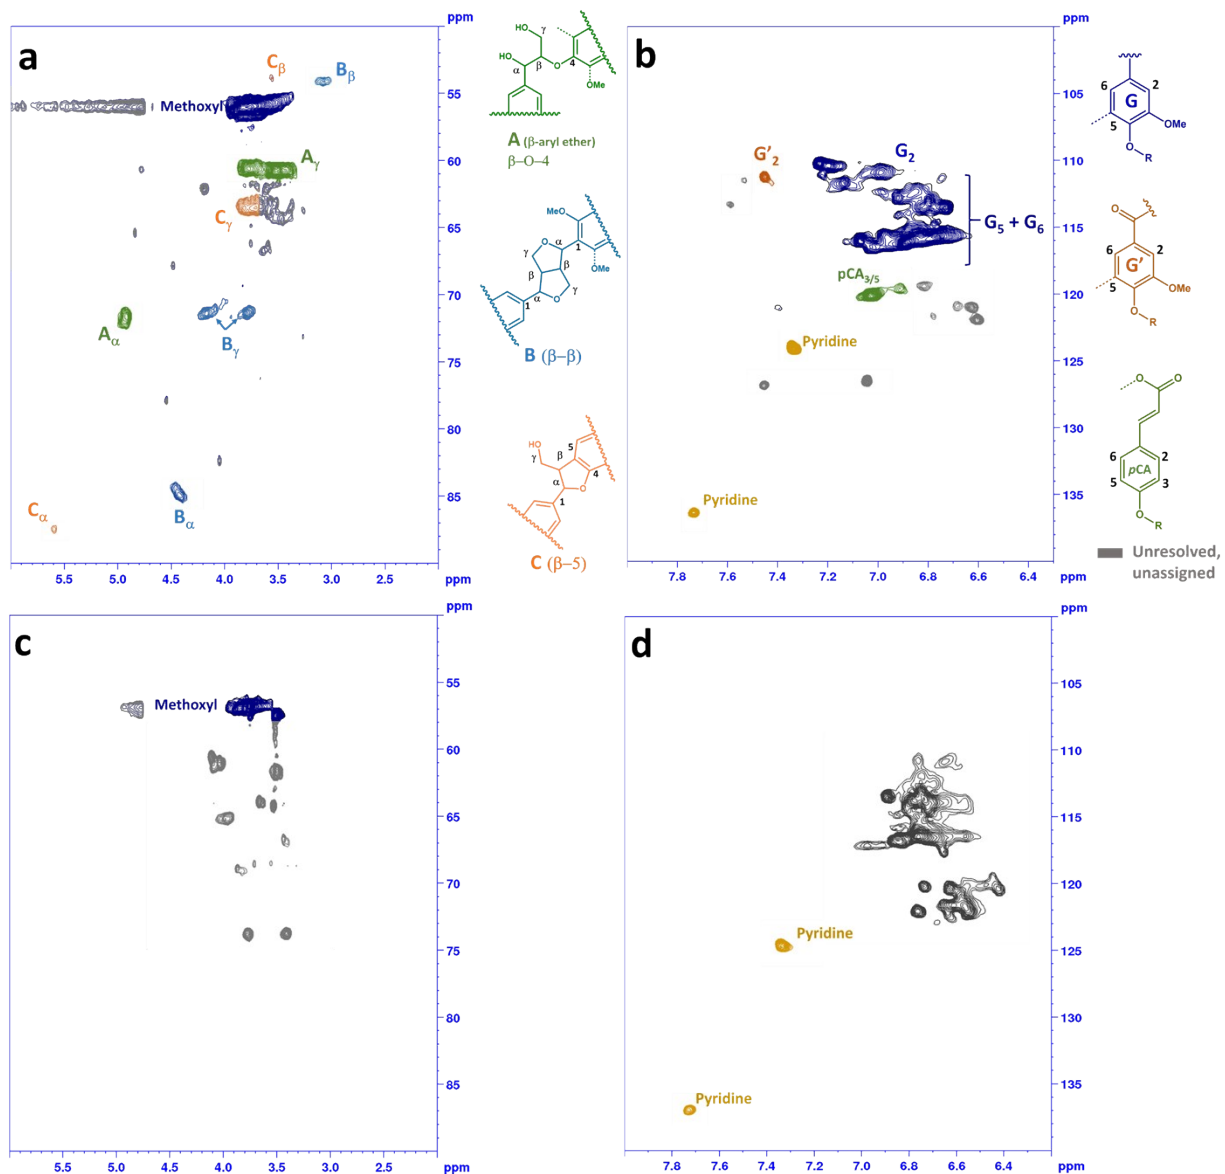

**Fig. S1** Two-dimensional HSQC-NMR spectra of softwood alkali lignin (a) in the aliphatic side chain region ( $\delta_C/\delta_H$  of 50–90/2–6 ppm), (b) in the aromatic ring region ( $\delta_C/\delta_H$  of 100–140/6.2–8.0 ppm) and of the bio-oil (c) aliphatic side chain region ( $\delta_C/\delta_H$  of 50–90/2–6 ppm) and (d) aromatic ring region ( $\delta_C/\delta_H$  of 100–140/6.2–8.0 ppm). The conditions and properties of the bio-oil was listed in Table 1 (entry 4). The peaks are assigned according to the literature.<sup>1, 2</sup>

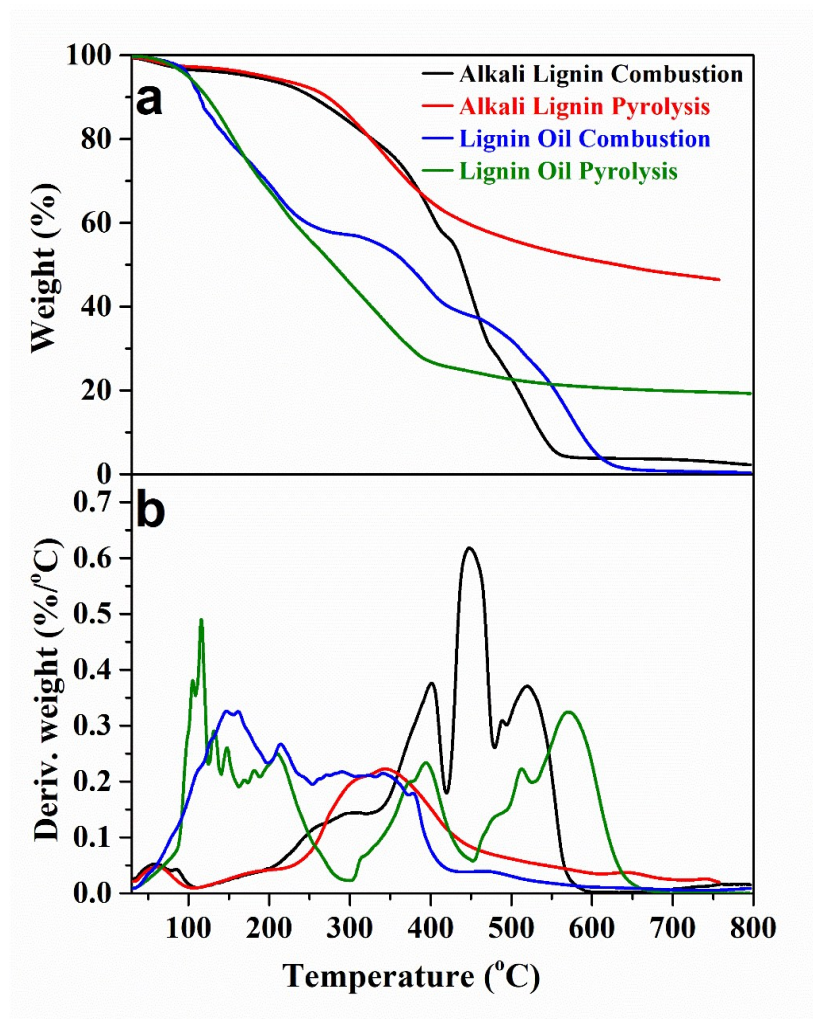

**Fig. S2** TGA (a) and DTG (b) profiles of the alkali lignin and bio-oil (case 4 in Table 1) collected under airflow condition (combustion) and N<sub>2</sub> flow condition (pyrolysis).

**Table S2** Proximate and ultimate analysis of the alkali lignin and bio-oil.

|                      | Proximate analysis (wt %, d.b.) <sup>a</sup> |                 |     |                  | Ultimate analysis (wt%, d.a.f.) <sup>b</sup> |      |      |      |                   |      |      |
|----------------------|----------------------------------------------|-----------------|-----|------------------|----------------------------------------------|------|------|------|-------------------|------|------|
|                      | VM <sup>c</sup>                              | FC <sup>d</sup> | Ash | Moisture         | C                                            | H    | O    | N    | S                 | O/C  | H/C  |
| Lignin               | 46.5                                         | 51.5            | 2.3 | 2.7              | 63.7                                         | 5.11 | 30.0 | 0.26 | 1.74 <sup>f</sup> | 0.35 | 0.96 |
| Bio-oil <sup>e</sup> | 80.7                                         | 18.9            | 0.3 | N.A <sup>g</sup> | 69.3                                         | 7.31 | 22.1 | 0.09 | 0.36              | 0.24 | 1.27 |

<sup>a</sup> On a dry basis.

<sup>b</sup> On a dry, ash-free basis.

<sup>c</sup> VM: volatile matter.

<sup>d</sup> FC: fixed carbon.

<sup>c,d</sup> VM and FC were determined using thermogravimetric analysis (TGA) in N<sub>2</sub> at 10 °C min<sup>-1</sup> to 800 °C.

<sup>e</sup> The bio-oil was produced at 3 g lignin, 60 g ethanol, and 12 g formic acid for 60 min (case 4 in Table 1)

<sup>f</sup> Low-sulfur-containing alkali lignin (1.74 wt% of sulfur) was used instead of high-sulfur-containing conventional Kraft lignin.

<sup>g</sup> The sulfur in bio-oil was only 0.36 wt%. However, no sulfur containing species were detected in bio-oil using GC-TOF/MS. The reason of the contradictory results of GC-TOF/MS and EA could be due to the limitation of GC-MS, which is able to detect only volatile fractions of bio-oil with molecular weights less than 650 m/z. Therefore, we believe that the sulfur detected by EA could be present in the form of non-volatile heavy oil fraction. The rest of sulfur might have been lost in the gaseous form, but due to the limitation of RGA-GC, we are not able to detect any sulfurous gas.

<sup>g</sup> N.A = Not applicable due to the volatile fraction (b.p. < 100 °C) of the bio-oil.

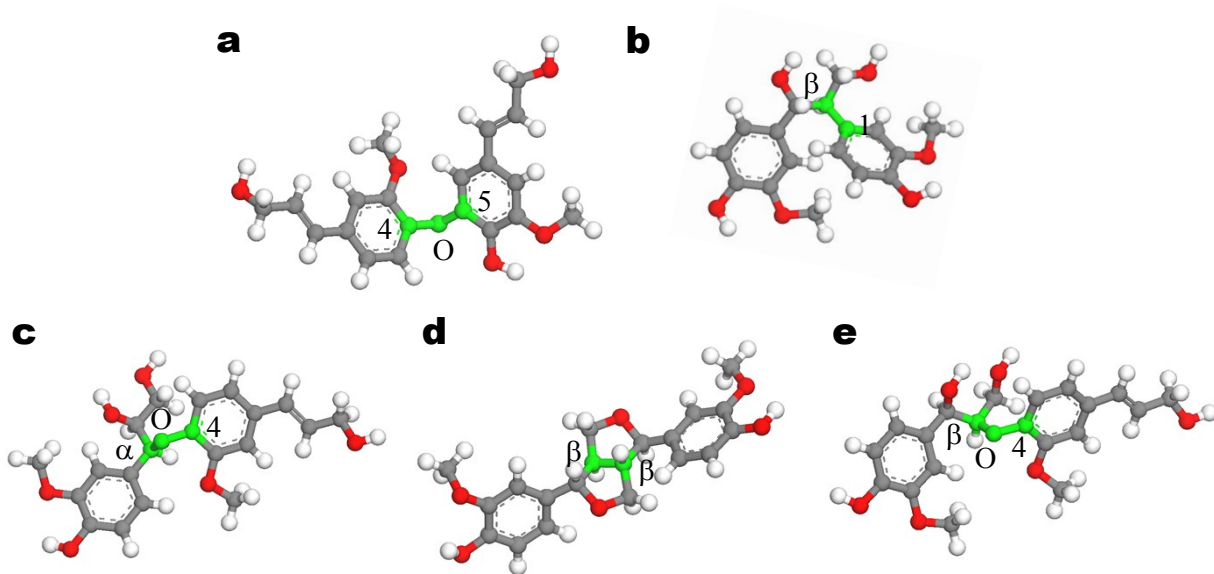

**Fig. S3** Molecular models of **a** 4-O-5, **b**  $\beta$ -1, **c**  $\alpha$ -O-4, **d**  $\beta$ - $\beta$ , and **e**  $\beta$ -O-4 dilignol, respectively. For the clear view, the atoms comprising lignin linkage of the dilignol molecule is colored in green with the notes to indicate the connecting atoms. Carbon, hydrogen, and oxygen atoms are colored in gray, white, and red, respectively, except the linkage atoms.

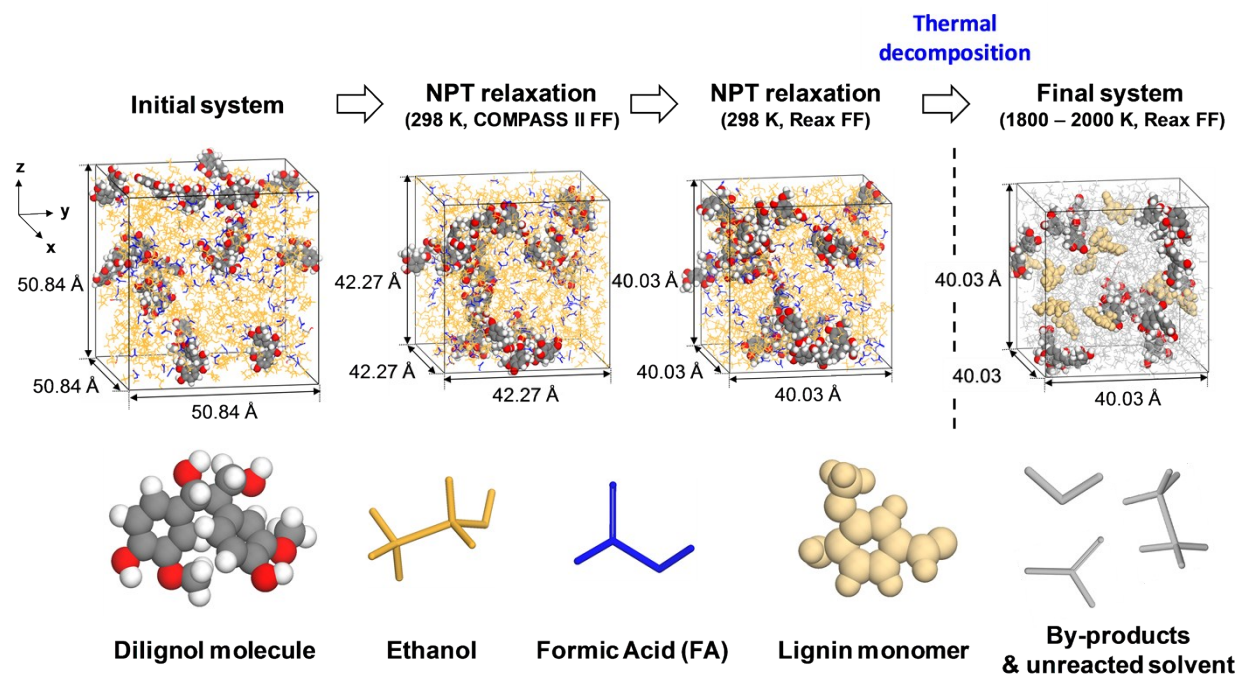

**Fig. S4** Schematic illustration of simulation models by reax-MD simulation procedure. The lattice parameters were taken from the  $\beta$ -1 dilignol system, and there were less than 1 Å differences between systems. From the initial to NPT relaxation using reax FF, simulation system was composed of three species, i.e. dilignol molecule, ethanol, and formic acid (FA). For the clear view, ethanol and FA were presented by orange and blue stick, respectively. Dilignol molecules were shown by CPK style with each atomic color (i.e. gray, red, and white for carbon, oxygen, and hydrogen, respectively). After the thermal decomposition, final system was composed of unreacted reactants, lignin monomers, and byproducts. Except dilignol molecules, lignin monomers and remaining byproducts including unreacted solvent are shown by ivory CPK molecule, and light gray stick, respectively.



**Table S3** Product yields and solvent consumption by the thermal and catalytic decomposition of methanol, ethanol, and isopropanol in the blank experiments.

| No. | Solvent               | Reaction conditions <sup>f</sup> | Reaction Pressure | Final Pressure <sup>g</sup> | Gas <sup>h</sup> | Water <sup>i</sup> | SDLPs | Solvent consumption <sup>j</sup> |
|-----|-----------------------|----------------------------------|-------------------|-----------------------------|------------------|--------------------|-------|----------------------------------|
|     |                       |                                  | MPa               |                             | wt%              |                    |       |                                  |
| 1   | methanol              | 200 °C, 30 min                   | 3.9               | 0                           | 0                | 0                  | -     | 0                                |
| 2   | methanol              | 250 °C, 30 min                   | 10.2              | 0                           | 0                | 0                  | -     | 0.37                             |
| 3   | methanol              | 300 °C, 30 min                   | 20.2              | 0                           | 0                | 0                  | -     | 1.00                             |
| 4   | methanol              | 350 °C, 30 min                   | 29.8              | 0.2                         | 0.32             | 0.83               | -     | 3.64                             |
| 5   | methanol              | 400 °C, 30 min                   | 42.0              | 1.1                         | 1.40             | 0.93               | -     | 10.08                            |
| 6   | methanol              | 400 °C, 120 min                  | 46.0              | 4.1                         | 3.58             | 1.32               | -     | 23.47                            |
| 7   | methanol <sup>a</sup> | 300 °C, 30 min                   | 20.0              | 0.4                         | 0.4              | 1.167              | -     | 6.42                             |
| 8   | methanol <sup>a</sup> | 350 °C, 30 min                   | 37.5              | 2.6                         | 2.83             | 4.36               | -     | 19.81                            |
| 9   | methanol <sup>b</sup> | 300 °C, 30 min                   | 20.0              | 0.6                         | 0.48             | 0                  | -     | 5.25                             |
| 10  | methanol <sup>b</sup> | 350 °C, 30 min                   | 42.1              | 5.0                         | 5.02             | 2.97               | -     | 20.89                            |
| 11  | ethanol               | 200 °C, 30 min                   | 2.6               | 0                           | 0                | 0                  | -     | 0                                |
| 12  | ethanol               | 250 °C, 30 min                   | 7.8               | 0                           | 0                | 0                  | -     | 0.14                             |
| 13  | ethanol               | 300 °C, 30 min                   | 17.8              | 1.0                         | 0.15             | 0.4                | -     | 2.01                             |
| 14  | ethanol               | 350 °C, 30 min                   | 22.0              | 3.0                         | 0.56             | 0.67               | 4.95  | 11.10                            |
| 15  | ethanol               | 400 °C, 30 min                   | 34.2              | 2.2                         | 1.75             | 1.37               | -     | 16.81                            |
| 16  | ethanol               | 400 °C, 120 min                  | 40.2              | 4.3                         | 5.83             | 7.78               | -     | 45.55                            |
| 17  | ethanol <sup>a</sup>  | 300 °C, 30 min                   | 16.0              | 0.7                         | 0.92             | 1.48               | -     | 11.30                            |
| 18  | ethanol <sup>a</sup>  | 350 °C, 30 min                   | 30.1              | 2.5                         | 2.38             | 6.01               | -     | 29.44                            |
| 19  | ethanol <sup>c</sup>  | 350 °C, 30 min                   | 34.5              | 4.4                         | 5.98             | 7.2                | 11.46 | 49.44                            |
| 20  | ethanol <sup>b</sup>  | 300 °C, 30 min                   | 18.3              | 0.8                         | 1.02             | 0                  | -     | 12.62                            |
| 21  | ethanol <sup>b</sup>  | 350 °C, 30 min                   | 27.7              | 2.1                         | 3.05             | 4.85               | -     | 25.67                            |
| 22  | ethanol <sup>d</sup>  | 350 °C, 30 min                   | 31.6              | 3.8                         | 5.55             | 6.89               | 10.35 | 45.45                            |
| 23  | IPA                   | 200 °C, 30 min                   | 2.5               | 0                           | 0                | 0                  | -     | 0                                |
| 24  | IPA                   | 250 °C, 30 min                   | 8.3               | 0                           | 0                | 0                  | -     | 0                                |
| 25  | IPA                   | 300 °C, 30 min                   | 12.3              | 0.2                         | 0.32             | 0                  | -     | 0.79                             |
| 26  | IPA                   | 350 °C, 30 min                   | 20.3              | 1.2                         | 1.48             | 0.21               | -     | 7.42                             |
| 27  | IPA                   | 400 °C, 30 min                   | 35.1              | 3.6                         | 3.15             | 0.59               | -     | 14.16                            |
| 28  | IPA                   | 400 °C, 120 min                  | 38.5              | 6.0                         | 5.47             | 2.64               | -     | 31.90                            |
| 29  | IPA <sup>a</sup>      | 300 °C, 30 min                   | 17.2              | 1.1                         | 1.57             | 2.82               | -     | 16.60                            |
| 30  | IPA <sup>a</sup>      | 350 °C, 30 min                   | 27.1              | 2.0                         | 2.68             | 5.07               | -     | 20.51                            |
| 31  | IPA <sup>b</sup>      | 300 °C, 30 min                   | 16.8              | 0.9                         | 1.22             | 2.22               | -     | 15.37                            |
| 32  | IPA <sup>b</sup>      | 350 °C, 30 min                   | 24.1              | 3.3                         | 2.38             | 4.42               | -     | 19.78                            |
| 33  | ethanol <sup>c</sup>  | 350 °C, 30 min                   | 34.4              | 6.1                         | 4.18             | 5.61               | 1.26  | 4.03                             |

<sup>a</sup> 0.2 g CoMo/ $\gamma$ -Al<sub>2</sub>O<sub>3</sub> (sulfided); <sup>b</sup> Ru/ $\gamma$ -Al<sub>2</sub>O<sub>3</sub> (activated); <sup>c</sup> 0.5 g CoMo/ $\gamma$ -Al<sub>2</sub>O<sub>3</sub> (sulfided); <sup>d</sup> 0.5 g Ru/ $\gamma$ -Al<sub>2</sub>O<sub>3</sub> (activated); <sup>e</sup> 12 g formic acid.

<sup>f</sup> Reactions were performed in inert environment (N<sub>2</sub>) at atmospheric pressure. 60 g of solvent was used in all cases.

<sup>g</sup> Final pressure; an indication of solvent decomposition to gas, was recorded after cooling the reactor to room temperature.

<sup>h</sup> Gas was collected in a Tedler bag through wet gas meter. The weight of gas was calculated in two different ways: (1) using Tedler bag's weight difference basis and (2) using an ideal gas law to calculate the total number of moles of individual gas species as detected in RGA-GC (volume of the gas was calculated using wet gas meter). Both values are in good agreement with less than 10% variance. The final weight of gas also included the weight of nitrogen which was used initially to pressurize the reactor.

<sup>i</sup> Moisture content was determined using Karl fisher titration, and average values of three readings were presented.

<sup>j</sup> Solvent consumption was calculated using external standard method by drawing a calibration curve of respective analyte in GC-FID.

**Table S4** Composition of the gases formed by the thermal and catalytic decomposition of methanol, ethanol, and isopropanol in the blank experiments.

|    | Solvent               | Reaction Conditions <sup>f</sup> | Gas composition (mmol) |       |                 |                 |                                                              |                                                               |                  | Total  |
|----|-----------------------|----------------------------------|------------------------|-------|-----------------|-----------------|--------------------------------------------------------------|---------------------------------------------------------------|------------------|--------|
|    |                       |                                  | H <sub>2</sub>         | CO    | CO <sub>2</sub> | CH <sub>4</sub> | C <sub>2</sub> H <sub>6</sub> /C <sub>2</sub> H <sub>4</sub> | C <sub>3</sub> H <sub>6</sub> , C <sub>3</sub> H <sub>8</sub> | C <sub>4</sub> + |        |
| 1  | methanol              | 200 °C, 30 min                   | -                      | -     | -               | -               | -                                                            | -                                                             | -                | 0      |
| 2  | methanol              | 250 °C, 30 min                   | -                      | -     | -               | -               | -                                                            | -                                                             | -                | 0      |
| 3  | methanol              | 300 °C, 30 min                   | -                      | -     | -               | -               | -                                                            | -                                                             | -                | 0      |
| 4  | methanol              | 350 °C, 30 min                   | 0.71                   | -     | 0.21            | 2.80            | -                                                            | -                                                             | -                | 3.72   |
| 5  | methanol              | 400 °C, 30 min                   | 8.68                   | 7.99  | 0.48            | 2.79            | -                                                            | -                                                             | -                | 19.94  |
| 6  | methanol              | 400 °C, 120 min                  | 58.46                  | 49.97 | 5.92            | 19.8            | -                                                            | -                                                             | -                | 134.1  |
| 7  | methanol <sup>a</sup> | 300 °C, 30 min                   | 4.50                   | -     | 0.45            | 3.60            | -                                                            | -                                                             | -                | 8.55   |
| 8  | methanol <sup>a</sup> | 350 °C, 30 min                   | 54.72                  | 0.13  | 6.28            | 29.32           | -                                                            | -                                                             | -                | 90.45  |
| 9  | methanol <sup>b</sup> | 300 °C, 30 min                   | 12.44                  | 4.98  | 0.05            | 0.77            | -                                                            | -                                                             | -                | 18.24  |
| 10 | methanol <sup>b</sup> | 350 °C, 30 min                   | 57.86                  | 21.36 | 14.56           | 57.61           | -                                                            | -                                                             | -                | 151.3  |
| 11 | ethanol               | 200 °C, 30 min                   | -                      | -     | -               | -               | -                                                            | -                                                             | -                | 0      |
| 12 | ethanol               | 250 °C, 30 min                   | -                      | -     | -               | -               | -                                                            | -                                                             | -                | 0      |
| 13 | ethanol               | 300 °C, 30 min                   | 0.24                   | -     | 0.002           | 0.02            | 0.022                                                        | -                                                             | -                | 0.29   |
| 14 | ethanol               | 350 °C, 30 min                   | 4.75                   | 0.009 | 0.20            | 0.25            | 0.71                                                         | 0.02                                                          | 0.015            | 5.95   |
| 15 | ethanol               | 400 °C, 30 min                   | 19.32                  | 0.52  | 10.08           | 9.7             | 9.15                                                         | 0.66                                                          | 0.30             | 49.73  |
| 16 | ethanol               | 400 °C, 120 min                  | 86.5                   | 4.01  | 17.40           | 22.01           | 28.60                                                        | 1.57                                                          | 0.60             | 160.7  |
| 17 | ethanol <sup>a</sup>  | 300 °C, 30 min                   | 15.80                  | 0.06  | 0.016           | 0.25            | 3.94                                                         | 0.007                                                         | 0.07             | 20.14  |
| 18 | ethanol <sup>a</sup>  | 350 °C, 30 min                   | 30.87                  | 1.62  | 0.36            | 2.61            | 22.37                                                        | 0.06                                                          | 0.33             | 58.21  |
| 19 | ethanol <sup>c</sup>  | 350 °C, 30 min                   | 15.26                  | 0.57  | 2.93            | 6.09            | 68.23                                                        | 0.46                                                          | 2.4              | 95.99  |
| 20 | ethanol <sup>b</sup>  | 300 °C, 30 min                   | 7.79                   | 2.41  | 0.07            | 3.28            | 0.24                                                         | 0.05                                                          | 0.02             | 13.87  |
| 21 | ethanol <sup>b</sup>  | 350 °C, 30 min                   | 24.35                  | 8.93  | 0.93            | 19.54           | 24.57                                                        | 0.06                                                          | 0.33             | 78.71  |
| 22 | ethanol <sup>d</sup>  | 350 °C, 30 min                   | 8.56                   | 5.17  | 2.96            | 49.59           | 41.75                                                        | 0.78                                                          | 1.06             | 109.9  |
| 23 | IPA                   | 200 °C, 30 min                   | -                      | -     | -               | -               | -                                                            | -                                                             | -                | 0      |
| 24 | IPA                   | 250 °C, 30 min                   | -                      | -     | -               | -               | -                                                            | -                                                             | -                | 0      |
| 25 | IPA                   | 300 °C, 30 min                   | 0.53                   | -     | 0.004           | 0.07            | 0.002                                                        | 0.093                                                         | 0.004            | 0.706  |
| 26 | IPA                   | 350 °C, 30 min                   | 20.70                  | 0.05  | 0.02            | 1.27            | 0.0                                                          | 0.480                                                         | 0                | 22.52  |
| 27 | IPA                   | 400 °C, 30 min                   | 87.48                  | 0.01  | 0.09            | 7.56            | 0.16                                                         | 4.86                                                          | 0.07             | 100.2  |
| 28 | IPA                   | 400 °C, 120 min                  | 187.0                  | 0.88  | 0.20            | 7.54            | 0.20                                                         | 5.21                                                          | 0.10             | 201.1  |
| 29 | IPA <sup>a</sup>      | 300 °C, 30 min                   | 18.04                  | -     | 0.03            | 0.12            | -                                                            | 16.56                                                         | 0.008            | 34.76  |
| 30 | IPA <sup>a</sup>      | 350 °C, 30 min                   | 42.27                  | -     | 2.25            | 17.87           | -                                                            | 23.01                                                         | 0.09             | 85.48  |
| 31 | IPA <sup>b</sup>      | 300 °C, 30 min                   | 16.02                  | -     | 6.06            | 0.09            | -                                                            | 10.1                                                          | 0.03             | 32.28  |
| 32 | IPA <sup>b</sup>      | 350 °C, 30 min                   | 47.01                  | -     | 1.9             | 9.01            | -                                                            | 19.0                                                          | 0.088            | 76.99  |
| 33 | ethanol <sup>c</sup>  | 350 °C, 30 min                   | 127.1                  | 34.13 | 52.57           | 0.67            | 2.10                                                         | -                                                             | -                | 216.57 |

<sup>a</sup> 0.2 g CoM<sub>O</sub>/γ-Al<sub>2</sub>O<sub>3</sub> (sulfided); <sup>b</sup> 0.2 g Ru/γ-Al<sub>2</sub>O<sub>3</sub> (activated); <sup>c</sup> 0.5 g CoM<sub>O</sub>/γ-Al<sub>2</sub>O<sub>3</sub> (sulfided); <sup>d</sup> 0.5 g Ru/γ-Al<sub>2</sub>O<sub>3</sub> (activated);

<sup>e</sup> 12 g formic acid.

<sup>f</sup> Reactions were performed in inert environment (N<sub>2</sub>) at atmospheric pressure. 60 g of solvent was used in all cases.

**Table S5** Major chemical species formed by the thermal decomposition of methanol determined by GC-TOF/MS.

| No. | Compound Name                              | R.T.<br>(min:sec) | GC Area           |                   |                   |                   |                   |                    |
|-----|--------------------------------------------|-------------------|-------------------|-------------------|-------------------|-------------------|-------------------|--------------------|
|     |                                            |                   | 200 °C,<br>30 min | 250 °C,<br>30 min | 300 °C,<br>30 min | 350 °C,<br>30 min | 400 °C,<br>30 min | 400 °C,<br>120 min |
| 1   | Dimethyl ether                             | 01:28.1           | 610907            | 2033418           | 3837419           | 22910488          | 117849735         | 1289507            |
| 2   | Cyclopropene                               | 01:29.5           |                   | 154932            | 156050            | 1395229           | 1481819           |                    |
| 3   | Methyl formate                             | 01:31.6           | 377492            | 758759            | 942140            | 3202644           | 13479653          | 53164074           |
| 4   | 2-Butene, 2-methyl-                        | 01:41.3           |                   |                   |                   |                   |                   | 2219716            |
| 5   | Methylal                                   | 01:42.9           |                   |                   | 299042            |                   | 9301080           | 82793316           |
| 6   | Acetic acid, methyl ester                  | 01:45.7           |                   |                   |                   |                   | 6008449           | 4346434            |
| 7   | 1,3,5,7-Tetroxane                          | 01:59.4           |                   |                   |                   | 6629045           | 35215055          | 22428438           |
| 8   | 1-Propanol                                 | 01:59.7           |                   |                   |                   |                   |                   | 1608783            |
| 9   | Ethane, 1,1-dimethoxy-                     | 02:02.9           |                   |                   |                   |                   | 105178            | 7083878            |
| 10  | 2-Propenoic acid, methyl ester             | 02:11.2           |                   |                   |                   |                   | 1777537           | 8671430            |
| 11  | Carbonic acid, dimethyl ester              | 02:12.5           |                   |                   |                   | 344767            | 1228444           |                    |
| 12  | Methyl propionate                          | 02:17.6           |                   |                   |                   |                   | 1539152           | 9355864            |
| 13  | 1-Propanol, 2-methyl-                      | 02:22.8           |                   |                   |                   |                   | 602744            | 9649555            |
| 14  | Propane, 2,2-dimethoxy-                    | 02:28.6           | 18461659          | 5573325           | 2912089           | 1667020           | 2267167           | 4092919            |
| 15  | Methyl isobutyrate                         | 02:48.4           |                   |                   |                   |                   |                   | 6233244            |
| 16  | Methyl methacrylate                        | 03:08.3           |                   |                   |                   |                   |                   | 3736726            |
| 17  | Butanoic acid, 2-methyl-, methyl ester     | 04:14.4           |                   |                   |                   |                   |                   | 2483270            |
| 18  | 1-Butanol, 3-methoxy-, acetate             | 04:34.2           |                   |                   |                   |                   |                   | 1000829            |
| 19  | 2(3H)-Furanone, dihydro-3-methyl-          | 08:28.3           |                   |                   |                   |                   |                   | 3227410            |
| 20  | Butanoic acid, 2,3-dimethyl-, methyl ester | 09:19.3           |                   |                   |                   |                   |                   | 2267568            |

**Table S6** Major chemical species formed by the thermal decomposition of ethanol determined by GC-TOF/MS.

| No. | Compound Name                     | R.T.<br>(min:sec) | GC Area           |                   |                   |                   |                    | 350 °C,<br>30 min<br>(EtOH-F.A) |
|-----|-----------------------------------|-------------------|-------------------|-------------------|-------------------|-------------------|--------------------|---------------------------------|
|     |                                   |                   | 250 °C,<br>30 min | 300 °C,<br>30 min | 350 °C,<br>30 min | 400 °C,<br>30 min | 400 °C,<br>120 min |                                 |
| 1   | Butane                            | 01:32.0           |                   |                   |                   |                   | 50963504           |                                 |
| 2   | 2-Butene                          | 01:33.7           |                   |                   |                   |                   | 2393551            |                                 |
| 3   | Isobutane                         | 01:40.9           |                   |                   |                   | 3220677           | 6497234            |                                 |
| 4   | Ethyl ether                       | 01:42.2           |                   |                   | 526602            | 12832227          | 76186193           |                                 |
| 5   | Isopropyl Alcohol                 | 01:42.6           |                   |                   |                   |                   | 184583847          |                                 |
| 6   | Acetic acid, methyl ester         | 01:46.8           |                   |                   |                   | 5269144           | 8047334            |                                 |
| 7   | Ethyl formate                     | 01:46.9           |                   |                   |                   |                   |                    | 107882                          |
| 8   | 2-Propen-1-ol                     | 01:52.4           |                   |                   |                   |                   | 1529033            |                                 |
| 9   | 1-Pentene, 3-methyl-              | 01:52.8           |                   |                   |                   | 756109            | 5393700            |                                 |
| 10  | 1-Propanol                        | 01:54.2           |                   |                   |                   | 2791065           | 9317437            |                                 |
| 11  | Pentane, 2-methyl-                | 01:55.0           |                   |                   |                   |                   | 1712742            |                                 |
| 12  | Pentane, 3-methyl-                | 01:59.3           |                   |                   |                   | 1127668           | 36073211           |                                 |
| 13  | 1-Hexene                          | 02:01.7           |                   |                   |                   |                   | 1557826            |                                 |
| 14  | 2-Propanone                       | 02:03.6           |                   |                   |                   |                   | 26710008           |                                 |
| 15  | 2-Butanone                        | 02:04.0           |                   |                   |                   | 154581079         | 202989835          |                                 |
| 16  | Butane                            | 02:04.5           |                   |                   |                   |                   | 3185407            |                                 |
| 17  | 2-Hexanol                         | 02:06.7           |                   |                   |                   |                   | 7010112            |                                 |
| 18  | 2-Butanol                         | 02:07.4           |                   |                   | 353934            | 93486337          | 360653683          | 586506                          |
| 19  | Ethyl Acetate                     | 02:10.6           | 1140829           | 20918933          | 173611464         | 87275678          | 43218220           | 1079278                         |
| 20  | 2-Pentene, 3-methyl-, (Z)-        | 02:12.7           |                   |                   |                   |                   | 12059146           |                                 |
| 21  | Cyclopentane, methyl-             | 02:17.3           |                   |                   |                   | 1401607           | 19894903           |                                 |
| 22  | Methyl propionate                 | 02:17.6           |                   |                   |                   |                   | 1827726            |                                 |
| 23  | Butane, 2-ethoxy-                 | 02:27.6           |                   |                   |                   |                   | 4153236            |                                 |
| 24  | 2-Butenal, (E)-                   | 02:29.0           |                   |                   | 9188003           | 2913551           | 11575330           |                                 |
| 25  | 2,3-Butanediol                    | 02:31.3           |                   |                   | 42357081          | 239343531         | 3460250            |                                 |
| 26  | 1-Butanol                         | 02:37.0           |                   |                   | 8594794           | 104281113         | 248722862          | 4982688                         |
| 27  | 2-Propen-1-ol, 2-methyl-          | 02:38.6           |                   |                   |                   | 50046387          | 15183769           |                                 |
| 28  | Hexane, 3-methyl-                 | 02:40.8           |                   |                   |                   |                   | 8010327            |                                 |
| 29  | Cyclohexene                       | 02:45.4           |                   |                   |                   | 1480050           | 27138711           |                                 |
| 30  | 2-Buten-1-ol, (Z)-                | 02:46.4           |                   |                   | 13494118          | 14703795          | 25234603           |                                 |
| 31  | (R)-(-)-2-Pentanol                | 02:47.9           |                   |                   |                   | 19718935          | 65835623           |                                 |
| 32  | 2-Pentanone                       | 02:48.8           |                   |                   |                   | 2586068           | 190191230          |                                 |
| 33  | Methane, diethoxy-                | 02:51.9           |                   |                   |                   |                   |                    | 3743911                         |
| 34  | Butane, 1-ethoxy-                 | 02:54.6           |                   |                   |                   |                   | 3779989            |                                 |
| 35  | 3-Pentanone                       | 02:56.1           |                   |                   |                   |                   | 1164628            |                                 |
| 36  | Formic acid, 1-methylpropyl ester | 02:56.1           |                   |                   |                   |                   |                    | 364699                          |
| 37  | Heptane                           | 02:57.2           |                   |                   |                   |                   | 7528613            |                                 |
| 38  | (S)-(+)-2-Pentanol                | 02:59.6           |                   |                   |                   | 68637089          | 238667534          |                                 |
| 39  | 3-Pentanol                        | 03:00.4           |                   |                   |                   |                   | 14066466           |                                 |
| 40  | Propanoic acid, ethyl ester       | 03:06.5           |                   |                   |                   |                   | 31230040           | 3539377                         |
| 41  | Cyclopentene, 3-ethyl-            | 03:16.1           |                   |                   |                   |                   | 1532872            |                                 |
| 42  | Ethane, 1,1-diethoxy-             | 03:20.8           |                   | 370506            | 2766017           | 21083427          | 77339555           | 62764644                        |
| 43  | Cyclopentane, ethyl-              | 03:27.9           |                   |                   |                   |                   | 2195163            |                                 |

|    |                                 |         |          |           |        |
|----|---------------------------------|---------|----------|-----------|--------|
| 44 | Furan, tetrahydro-2,5-dimethyl- | 03:28.2 |          | 6276954   |        |
| 45 | Cyclohexene, 3-methyl-          | 03:32.7 |          | 2314564   |        |
| 46 | 1-Butanol, 2-methyl-, (S)-      | 03:33.2 |          | 3135529   |        |
| 47 | 2-Pentanone, 3-methyl-          | 03:43.7 |          | 124841630 |        |
| 48 | 3-Heptene, 5-methyl-            | 03:44.8 |          | 2277246   |        |
| 49 | 3-Pentanol, 3-methyl-           | 03:47.9 | 1138042  | 98634260  | 96561  |
| 50 | Furan, tetrahydro-2,5-dimethyl- | 03:57.1 |          | 3439514   |        |
| 51 | 1-Pentanol                      | 04:01.4 |          | 6496715   |        |
| 52 | 3-Hexene, 3-ethyl-              | 04:04.8 |          | 1548658   |        |
| 53 | Heptane, 3-methyl-              | 04:05.1 |          | 12588109  |        |
| 54 | Hexane, 3-ethyl-                | 04:05.9 |          | 1213583   |        |
| 55 | 3-Hexanone                      | 04:18.6 |          | 44561266  |        |
| 56 | Heptane, 3-methylene-           | 04:23.1 |          | 5083542   |        |
| 57 | 2-Hexanone                      | 04:23.5 | 3580648  | 103245321 |        |
| 58 | 4-Ethyl-2-hexene                | 04:24.8 |          | 3776784   |        |
| 59 | 2-Pentanol, 3-methyl-           | 04:25.5 | 8368568  | 77220301  |        |
| 60 | 2-Pentanol, 3-methyl-           | 04:29.8 | 8694539  | 75254749  |        |
| 61 | 3-Ethyl-2-hexene                | 04:33.7 |          | 4323771   |        |
| 62 | 2,3-Dimethyl-1-hexene           | 04:34.9 |          | 4026087   |        |
| 63 | 3-Hexanol                       | 04:35.2 |          | 47184043  |        |
| 64 | Heptane, 2,4-dimethyl-          | 04:37.2 |          | 3282887   |        |
| 65 | Butanoic acid, ethyl ester      | 04:38.6 | 10426761 | 17985352  |        |
| 66 | 2-Hexanol                       | 04:41.4 | 37597208 | 62990552  | 741320 |
| 67 | Heptane, 3-methylene-           | 04:48.1 |          | 3797301   |        |
| 68 | Acetic acid, butyl ester        | 04:56.3 | 3459388  | 38142029  |        |
| 69 | Propane, 1,1-diethoxy-          | 05:01.1 |          |           | 320391 |
| 70 | Cyclohexene, 1,4-dimethyl-      | 05:16.9 |          | 1446637   |        |
| 71 | 1-Penten-3-one, 2-methyl-       | 05:24.1 |          | 14442820  |        |
| 72 | Cyclohexane, ethyl-             | 05:25.5 |          | 1959880   |        |
| 73 | 2-Pentanone, 3-ethyl-           | 05:27.4 |          | 14483621  |        |
| 74 | 3-Hexanone, 4-methyl-           | 05:30.9 |          | 2451281   |        |
| 75 | Cyclohexanone                   | 05:35.4 |          | 2548604   |        |
| 76 | 1-Butanol, 2-ethyl-             | 05:35.6 |          | 3364391   |        |
| 77 | 2,2,4-Trimethyl-3-pentanol      | 05:37.5 |          | 2121630   |        |
| 78 | 2-Pentanone, 3-ethyl-           | 05:38.3 |          | 3694517   |        |
| 79 | 1-Pentanol, 3-methyl-           | 05:42.1 |          | 47473456  |        |
| 80 | Cyclohexene, 3-ethyl-           | 05:47.9 |          | 11613438  |        |
| 81 | 2-Hexanone, 5-methyl-           | 05:56.9 |          | 1987893   |        |
| 82 | 4-Methyl-2-hexanol              | 06:10.1 |          | 5563006   |        |
| 83 | 2-Heptanol                      | 06:13.1 |          | 2479385   |        |
| 84 | 2-Pentanol, 3-methyl-           | 06:14.9 |          | 21235483  |        |
| 85 | 1-Hexanol                       | 06:16.6 |          | 9921316   |        |
| 86 | 4-Heptanone                     | 06:19.8 |          | 4716900   |        |
| 87 | 2-Hexanol, 3-methyl-            | 06:35.5 |          | 3091356   |        |
| 88 | 2-Hexanol, 3-methyl-            | 06:42.3 |          | 1748838   |        |
| 89 | 2-Pentanol                      | 06:45.5 |          | 1456765   |        |
| 90 | 2-Heptanone                     | 06:47.5 |          | 10127515  |        |
| 91 | 4-Heptanol                      | 06:52.1 |          | 1602939   |        |
| 92 | 3-Heptanol                      | 07:01.2 |          | 1977210   |        |
| 93 | 2-Heptanol, (S)-                | 07:07.6 |          | 36790657  |        |

|     |                             |         |         |          |
|-----|-----------------------------|---------|---------|----------|
| 94  | Butane, 1-(1-ethoxyethoxy)- | 07:26.9 |         | 1388668  |
| 95  | 3-Hexanone, 4-ethyl-        | 07:38.5 |         | 5457047  |
| 96  | 4-Heptanone, 3-methyl-      | 07:47.6 |         | 7408169  |
| 97  | 2,4-Dimethylhept-1-ene      | 08:09.3 |         | 1283694  |
| 98  | 3-Octanone                  | 08:12.7 |         | 1914744  |
| 99  | 3-Heptanol, 3-methyl-       | 08:13.8 |         | 27623717 |
| 100 | 2-Heptanone, 4-methyl-      | 08:15.2 |         | 4452808  |
| 101 | Octane, 4-ethyl-            | 08:36.4 |         | 1446449  |
| 102 | Hexane, 1-nitro-            | 08:44.9 |         | 2675865  |
| 103 | 2-Heptanol, 5-methyl-       | 08:50.2 |         | 2714309  |
| 104 | 2-Heptanone, 5-methyl-      | 08:52.7 |         | 2863184  |
| 105 | 4-Heptanol, 3-methyl-       | 09:01.8 |         | 1550491  |
| 106 | 4-Octanone                  | 09:08.7 |         | 2961888  |
| 107 | 2-Heptanol, 3-methyl-       | 09:19.8 |         | 2270618  |
| 108 | 2-Octanone                  | 09:40.2 |         | 9729998  |
| 109 | 3-Octanol                   | 09:53.9 |         | 1956530  |
| 110 | Hexanoic acid, ethyl ester  | 09:55.9 | 1039844 | 3019776  |
| 111 | 2-Octanol                   | 10:01.8 |         | 34880453 |
| 112 | 1-Butanol, 3-methyl-        | 11:02.0 |         | 1613158  |
| 113 | 3-Octanol, 3-methyl-        | 11:09.3 |         | 1668847  |
| 114 | 2-Nonanol                   | 13:02.6 |         | 2989659  |
| 115 | 3-Octanol, 3,6-dimethyl-    | 13:06.0 |         | 1643521  |
| 116 | 3-Nonanol, 3-methyl-        | 14:09.0 |         | 1670366  |

**Table S7** Major chemical species formed by the thermal decomposition of isopropanol determined by GC-TOF/MS.

| No. | Compound Name                     | R.T.<br>(min:sec) | GC Area           |                   |                   |                    |
|-----|-----------------------------------|-------------------|-------------------|-------------------|-------------------|--------------------|
|     |                                   |                   | 300 °C,<br>30 min | 350 °C,<br>30 min | 400 °C,<br>30 min | 400 °C,<br>120 min |
| 1   | 1-Pentene, 2-methyl-              | 01:51.3           |                   | 2226115           | 5793786           | 82155435           |
| 2   | Butyl isocyanatoacetate           | 01:54.4           |                   |                   |                   | 16843985           |
| 3   | 2-Propyn-1-ol, acetate            | 01:54.5           |                   |                   |                   | 9611785            |
| 4   | Diisopropyl ether                 | 01:55.2           |                   | 506731            | 2145968           | 14537624           |
| 5   | 1-Pentene, 3-methyl-              | 01:56.7           |                   |                   |                   | 176930329          |
| 6   | 2-Pentene, 4-methyl-, (E)-        | 01:56.9           | 1063456           | 19323246          | 56617230          | 346355239          |
| 7   | Pentane, 1-propoxy-               | 02:01.2           |                   |                   |                   | 5223299            |
| 8   | Pentane, 2,2-dimethyl-            | 02:03.0           |                   |                   |                   | 10561325           |
| 9   | Pentane, 2,4-dimethyl-            | 02:04.9           |                   |                   |                   | 39919567           |
| 10  | 1,3-Pentadiene, 2-methyl-         | 02:09.9           |                   | 832849            | 2249027           |                    |
| 11  | (Z)-2,4-Hexadiene                 | 02:11.4           |                   | 902683            | 2563214           | 12508985           |
| 12  | Amylene hydrate                   | 02:12.6           |                   |                   |                   | 69357212           |
| 13  | 1-Pentene, 2,4-dimethyl-          | 02:13.2           |                   | 410996            |                   | 28795181           |
| 14  | 2-Pentene, 2,4-dimethyl-          | 02:15.7           |                   | 27175             |                   | 49721076           |
| 15  | Cyclopentene, 3-methyl-           | 02:16.0           |                   |                   |                   | 5786493            |
| 16  | Propane, 2,2-dimethoxy-           | 02:17.3           | 631278            | 907711            |                   |                    |
| 17  | 2-Butanone, 3-methyl-             | 02:21.2           |                   |                   |                   | 7906511            |
| 18  | Isopropyl acetate                 | 02:21.7           |                   | 1499313           | 3165845           | 7963277            |
| 19  | Hexane, 2-methyl-                 | 02:22.9           |                   |                   |                   | 41601342           |
| 20  | 3,5-Dimethylcyclopentene          | 02:23.1           |                   |                   |                   | 784512             |
| 21  | Pentane, 2,3-dimethyl-            | 02:25.0           |                   |                   |                   | 5625185            |
| 22  | Hexane, 3-methyl-                 | 02:28.1           |                   |                   |                   | 7817070            |
| 23  | Cyclopentane, 1,1-dimethyl-       | 02:28.7           |                   |                   |                   | 9060491            |
| 24  | (R)-(-)-2-Pentanol                | 02:34.3           |                   |                   |                   | 18997243           |
| 25  | Cyclopentane, 1,3-dimethyl-, cis- | 02:34.7           |                   |                   |                   | 14971119           |
| 26  | 2-Pentanone                       | 02:35.6           |                   |                   | 28059267          | 493560137          |
| 27  | Cyclopentane, 1,3-dimethyl-       | 02:36.5           |                   |                   |                   | 14967366           |
| 28  | Isopropyl Alcohol                 | 02:40.5           |                   |                   |                   | 17876622           |
| 29  | (S)-(+)-2-Pentanol                | 02:45.2           |                   |                   | 28955038          | 740412463          |
| 30  | 2-Hexene, 2-methyl-               | 02:45.5           |                   |                   | 3452592           | 23015925           |
| 31  | 2,4-Dimethylfuran                 | 02:54.6           |                   |                   |                   | 17268656           |
| 32  | Cyclopentane, 1,1,3-trimethyl-    | 03:03.2           |                   |                   |                   | 18095638           |
| 33  | 5,5-Dimethyl-1,3-hexadiene        | 03:04.5           |                   |                   |                   | 6798791            |
| 34  | Hexane, 2,5-dimethyl-             | 03:06.7           |                   |                   |                   | 10167430           |
| 35  | 2-Butanol, 2,3-dimethyl-          | 03:10.1           |                   | 6035371           | 43899629          | 340982453          |
| 36  | 2-Pentanol, 2-methyl-             | 03:12.9           |                   | 34949459          | 308098275         | 1.345E+09          |
| 37  | Methyl Isobutyl Ketone            | 03:16.2           |                   | 37382120          | 265849060         | 1.518E+09          |
| 38  | 4-Penten-2-one, 4-methyl-         | 03:25.5           |                   |                   | 27293194          | 115226007          |
| 39  | 1-Hexene, 4-methyl-               | 03:26.2           |                   |                   |                   | 11824157           |
| 40  | 2-Hexanol, (S)-                   | 03:36.5           |                   |                   |                   | 197449959          |
| 41  | 2-Pentanol, 4-methyl-             | 03:37.7           |                   | 10962267          | 149354496         | 1.795E+09          |
| 42  | Toluene                           | 03:42.8           |                   |                   |                   | 6747739            |
| 43  | 3-Hexanol                         | 03:51.3           |                   |                   |                   | 7289821            |
| 44  | Cyclohexane, 1,3-dimethyl-, cis-  | 03:56.9           |                   |                   |                   | 16417797           |
| 45  | 2-Pentanone, 4,4-dimethyl-        | 03:57.5           |                   |                   |                   | 14980781           |
| 46  | 2-Hexanone                        | 04:05.7           |                   |                   |                   | 363824511          |
| 47  | 2-Pentanol, 2,4-dimethyl-         | 04:09.4           |                   |                   |                   | 120059835          |
| 48  | 3-Penten-2-ol, 4-methyl-,         | 04:12.8           |                   |                   | 34440725          | 158183970          |
| 49  | 3-Penten-2-one, 4-methyl-         | 04:15.6           |                   |                   |                   | 450144209          |
| 50  | 2-Hexanol                         | 04:21.2           |                   |                   |                   | 484427019          |

|    |                                          |         |           |
|----|------------------------------------------|---------|-----------|
| 51 | Cyclohexane, 1,4-dimethyl-               | 04:27.5 | 12175316  |
| 52 | 3-Heptene, 2,6-dimethyl-                 | 04:32.8 | 6929183   |
| 53 | Heptane, 2,4-dimethyl-                   | 04:44.7 | 5998677   |
| 54 | 1,3-Dimethyl-1-cyclohexene               | 04:49.5 | 12432938  |
| 55 | Cyclohexene, 3,5-dimethyl-               | 04:52.1 | 32263067  |
| 56 | Heptane, 2,6-dimethyl-                   | 04:54.8 | 5134475   |
| 57 | 2,3-Dimethyl-2-heptene                   | 04:58.9 | 6915885   |
| 58 | 3,4,4-Trimethylcyclohexene               | 05:03.6 | 8003836   |
| 59 | 2-Hexanol, 2-methyl-                     | 05:04.0 | 8063057   |
| 60 | Cyclohexane, 1,1,3-trimethyl-            | 05:09.6 | 22426745  |
| 61 | 3-Heptene, 2,6-dimethyl-                 | 05:15.4 | 5613477   |
| 62 | 2-Penten-1-ol, 2-methyl-                 | 05:19.7 | 12294980  |
| 63 | 2-Hexanone, 5-methyl-                    | 05:35.0 | 144948807 |
| 64 | Cyclohexene, 3,5,5-trimethyl-            | 05:40.7 | 30012420  |
| 65 | 2-Hexanol, 5-methyl-                     | 05:51.3 | 167575205 |
| 66 | p-Xylene                                 | 05:54.5 | 49659136  |
| 67 | Cyclohexene, 3,3,5-trimethyl-            | 06:08.4 | 14406197  |
| 68 | Cyclohexene, 3,3,5-trimethyl-            | 06:25.8 | 11119333  |
| 69 | 2-Hexanol, 2,5-dimethyl-, (S)-           | 06:35.3 | 8659191   |
| 70 | 4-Heptanone, 2-methyl-                   | 07:18.6 | 15594546  |
| 71 | 2-Heptanone, 4-methyl-                   | 07:46.0 | 8509582   |
| 72 | 4-Heptanol, 2-methyl-                    | 08:01.5 | 7927181   |
| 73 | Cyclohexanol, 4-methyl-, cis-            | 08:03.6 | 5882631   |
| 74 | Benzene, 1,2,3-trimethyl-                | 08:37.2 | 219193619 |
| 75 | 4-Heptanone, 2,6-dimethyl-               | 08:39.7 | 22411627  |
| 76 | 1-Octene, 4-methyl-                      | 08:56.7 | 7277456   |
| 77 | 2-Heptanone, 4,6-dimethyl-               | 09:11.8 | 10382975  |
| 78 | 2-Heptanol, 2,6-dimethyl-                | 09:20.8 | 12091715  |
| 79 | Cyclohexanol, 3,5-dimethyl-              | 09:25.9 | 10508056  |
| 80 | 4-Heptanol, 2,6-dimethyl-                | 09:28.5 | 7809168   |
| 81 | Cyclohexanol, 3,5-dimethyl-              | 09:37.2 | 20566582  |
| 82 | 2-Hexanol, 3,4-dimethyl-                 | 09:44.2 | 10963144  |
| 83 | trans-3,5-Dimethylcyclohexanone          | 10:02.7 | 8101939   |
| 84 | 4-Octanone, 2-methyl-                    | 10:10.9 | 5356721   |
| 85 | Cyclohexanol, 3,5-dimethyl-              | 10:18.4 | 13315541  |
| 86 | Cyclopentane, 2-ethylidene-1,1-dimethyl- | 10:21.8 | 5814219   |
| 87 | Cyclohexanone, 3,3,5-trimethyl-          | 10:45.9 | 16938370  |
| 88 | Cyclohexanol, 3,3,5-trimethyl-           | 10:53.1 | 10426148  |
| 89 | Cyclohexanol, 3,3,5-trimethyl-           | 11:13.5 | 20640953  |
| 90 | Isophorone                               | 13:10.7 | 36151327  |



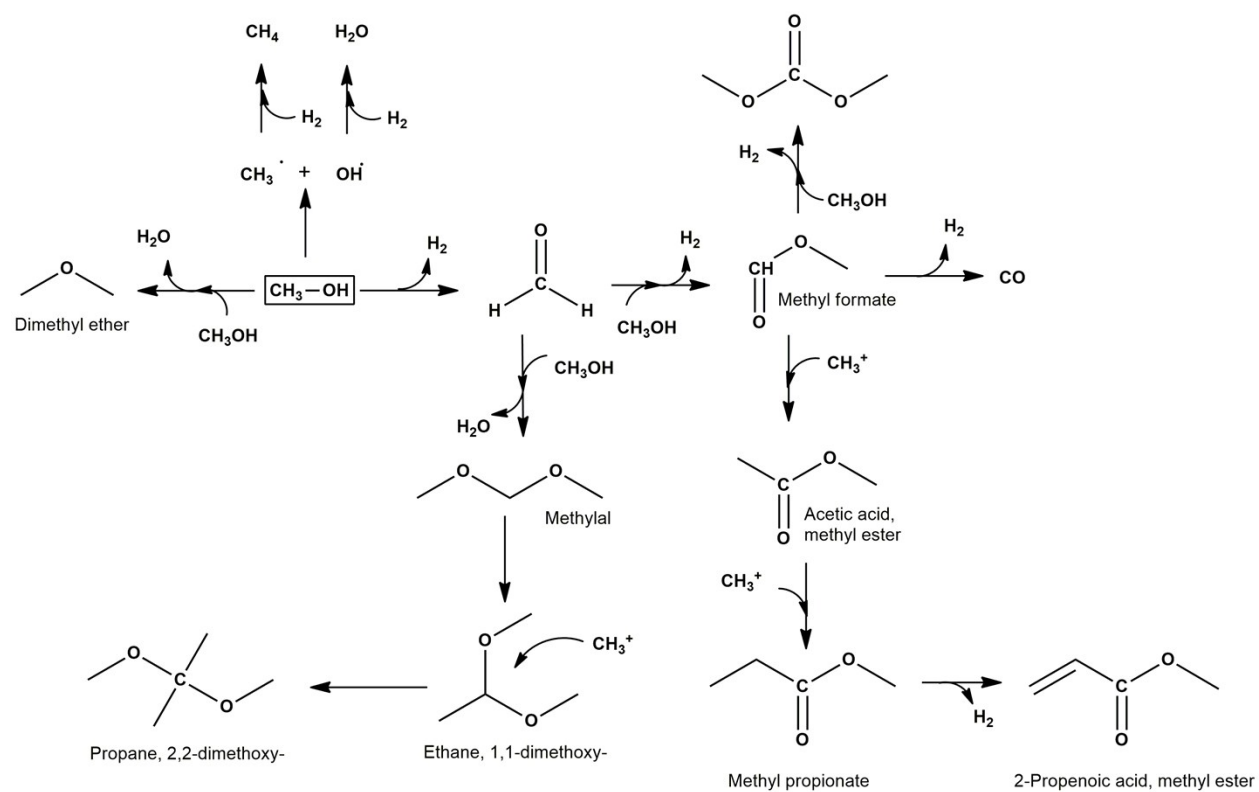

**Fig. S5** Plausible reaction mechanism for methanol-derived products.

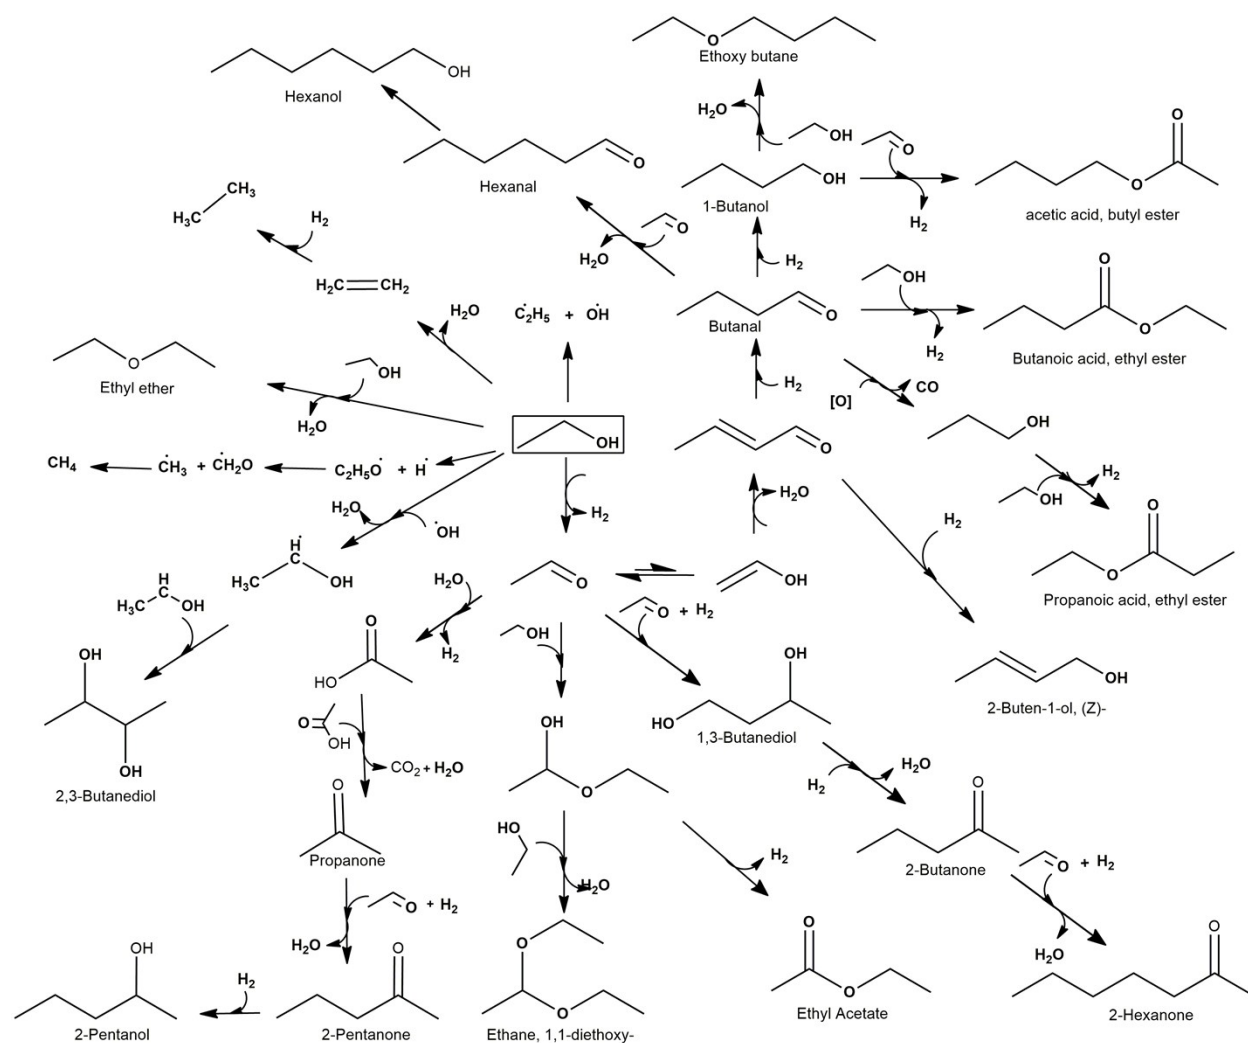

Fig. S6 Plausible reaction mechanism for ethanol-derived products.

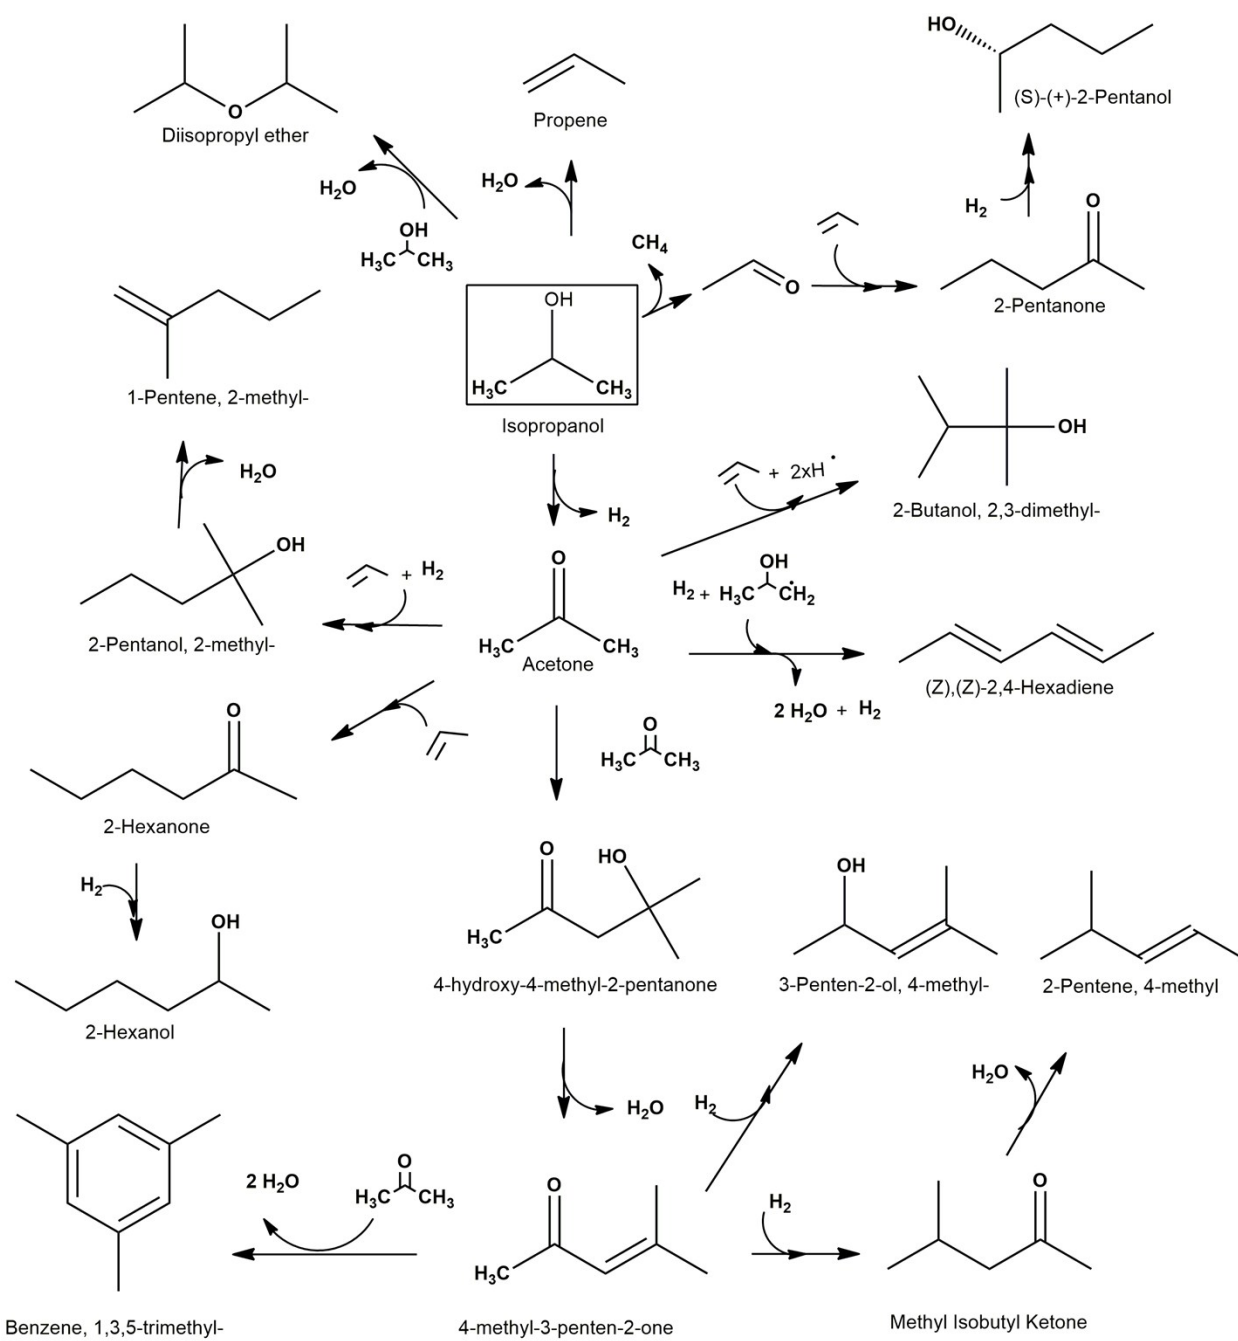

**Fig. S7** Plausible reaction mechanism for isopropanol derived products.

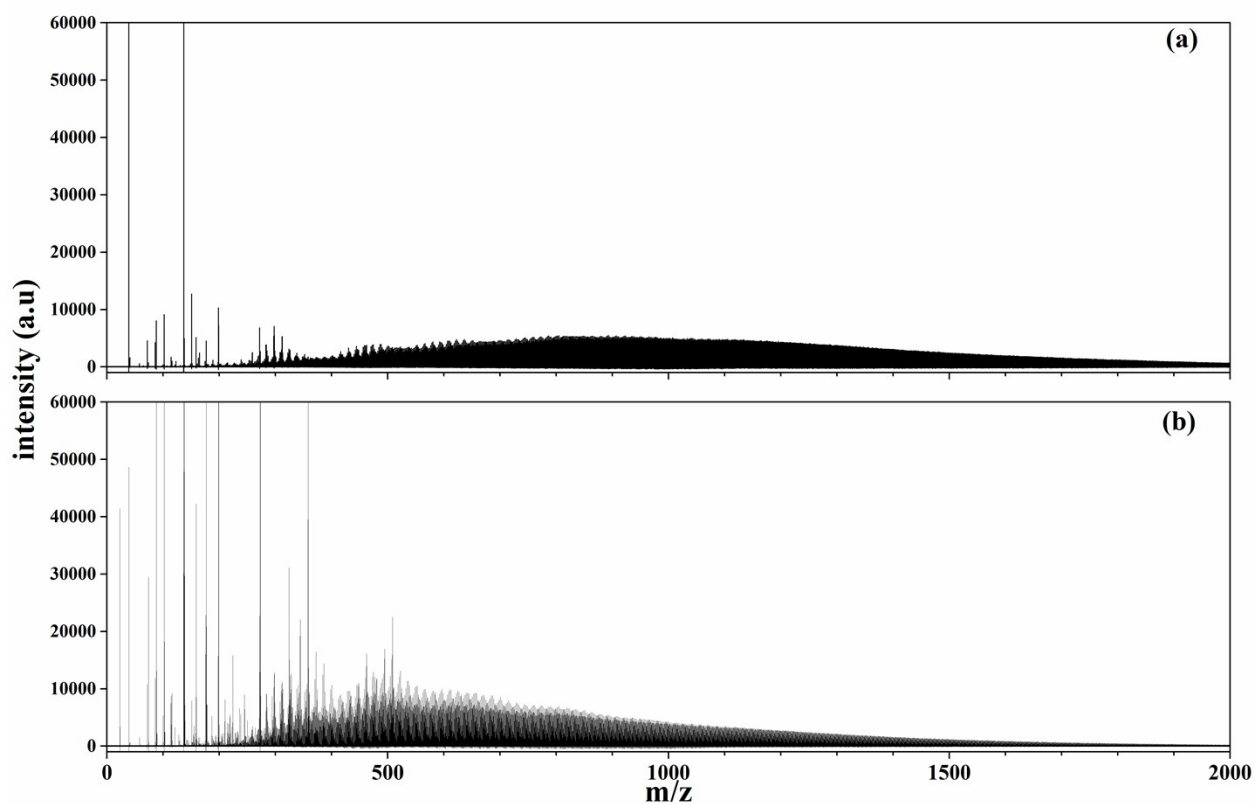

**Fig. S8** MALDI-TOF/MS spectra of the dried bio-oils produced from the experiment of (a) entry 1 and (b) entry 4 in Table 1. Entry 1 reaction condition: 3 g alkali lignin, 60 g ethanol, 0 g formic acid, 30 min, 350 °C, 23.2–24.0 MPa. Entry 4 reaction condition: 3 g alkali lignin, 60 g ethanol, 12 g formic acid, 30 min, 350 °C, 30.0–39.4 MPa.

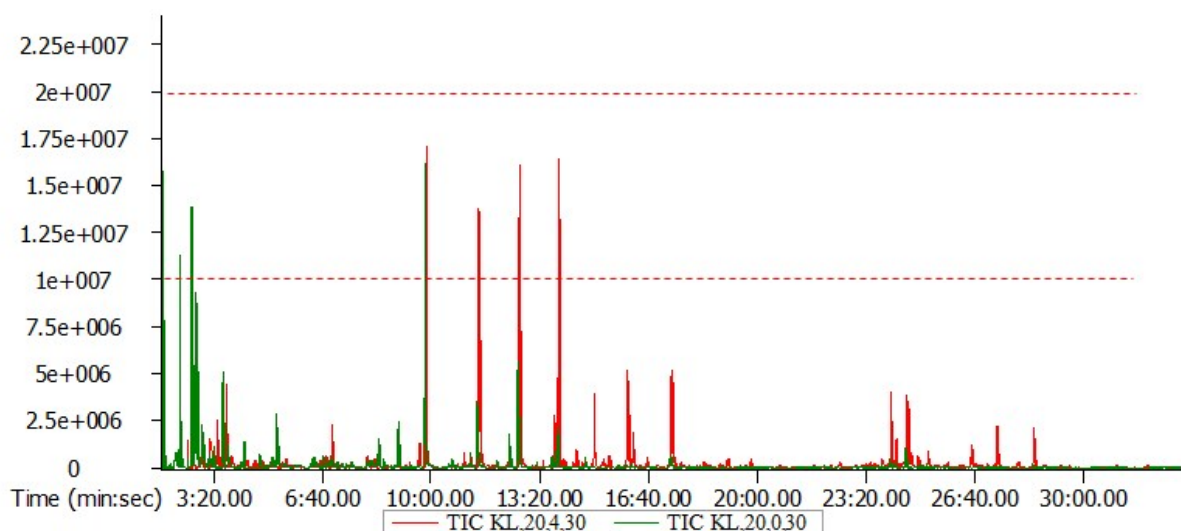

**Fig. S9** Superposition of the gas chromatograms for entry 1 (green) and entry 4 (red) in Table 1 to compare the product distribution. Entry 1 reaction condition: 3 g alkali lignin, 60 g ethanol, 0 g formic acid, 30 min, 350 °C, 23.2–24.0 MPa. Entry 4 reaction condition: 3 g alkali lignin, 60 g ethanol, 12 g formic acid, 30 min, 350 °C, 30.0–39.4 MPa.

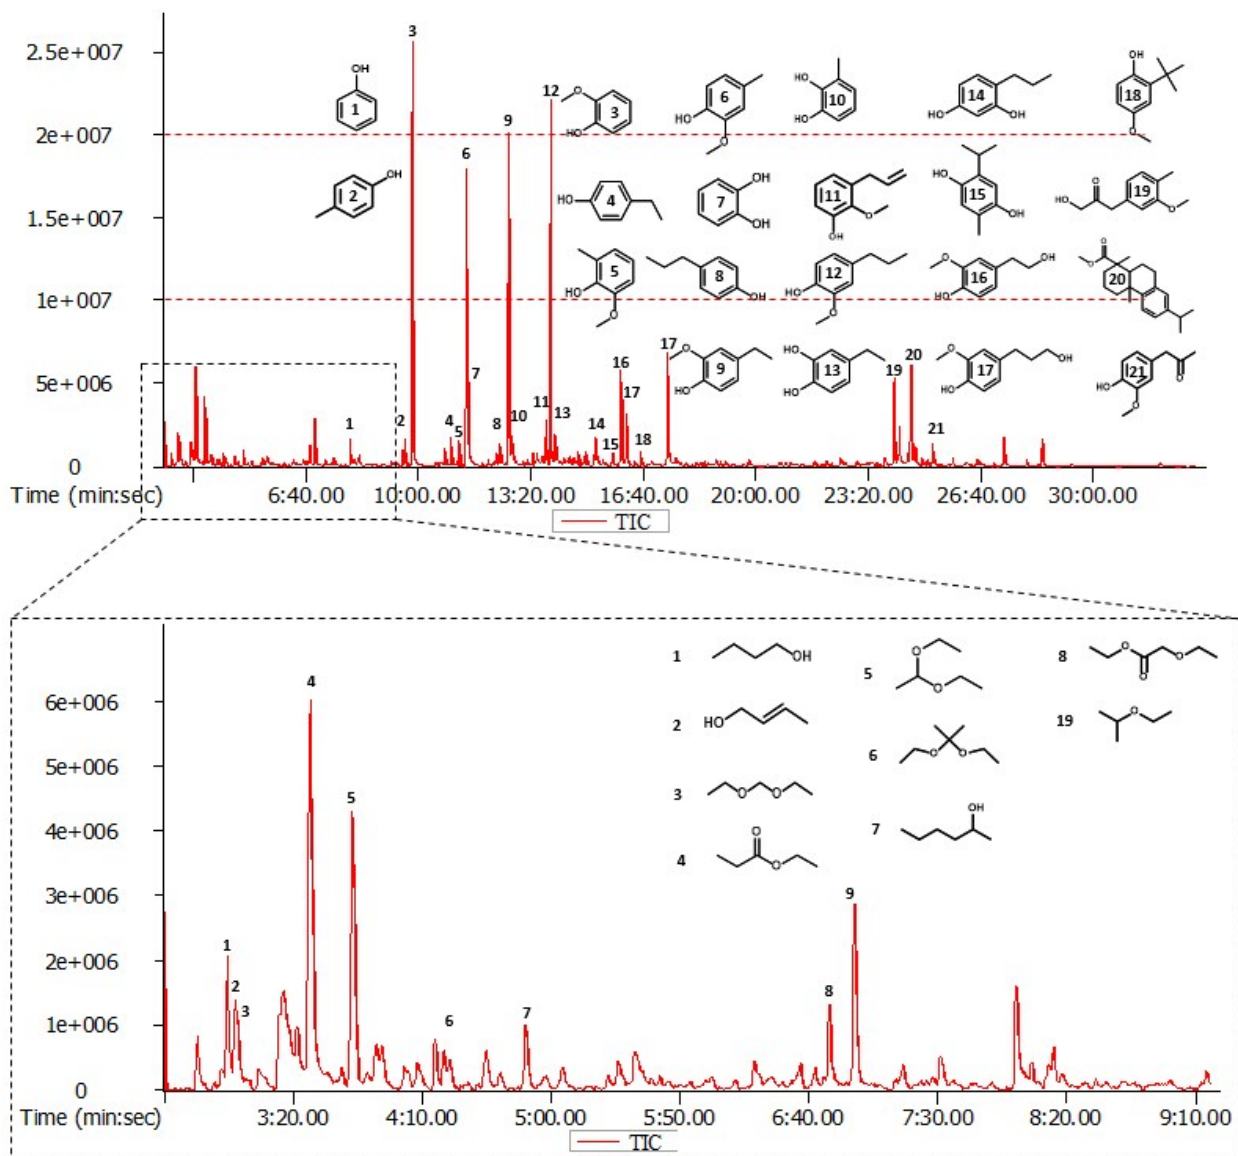

**Fig. S10** Gas chromatogram of the bio-oil collected immediately after the reaction in entry 5 in Table 1. Reaction condition: 3 g alkali lignin, 60 g ethanol, 12 g formic acid, 60 min, 350 °C, 29.5–42.1 MPa.

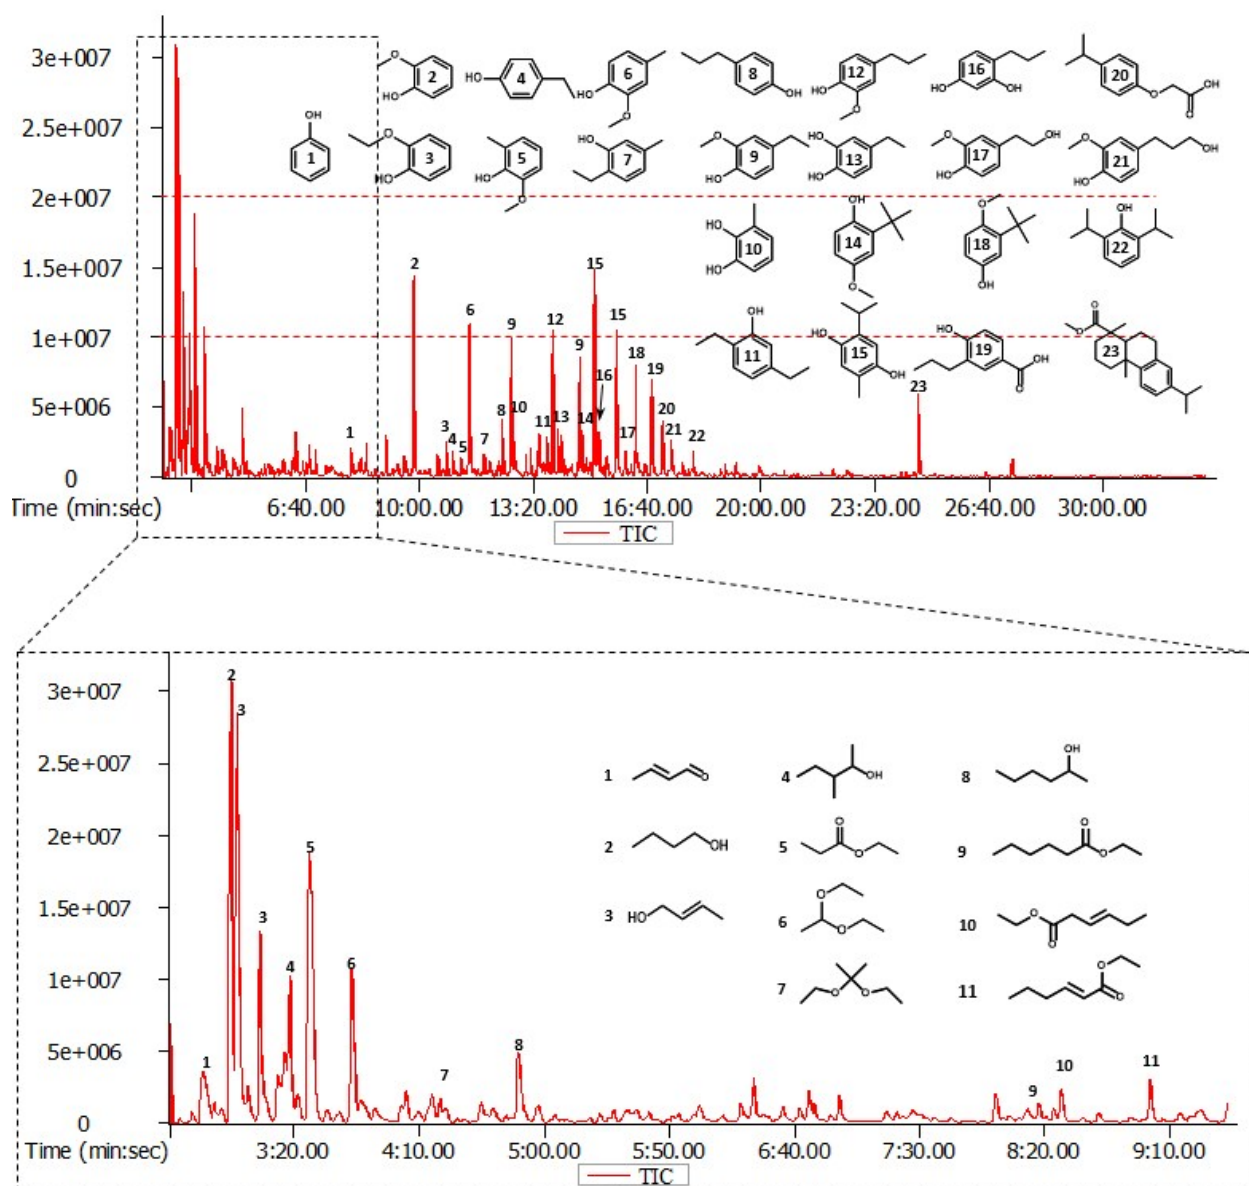

**Fig. S11** Gas chromatogram of the bio-oil collected immediately after the reaction in entry 6 in Table 1. Reaction condition: 3 g alkali lignin, 60 g ethanol, 12 g formic acid, 300 min, 350 °C, 29.8–43.6 MPa.

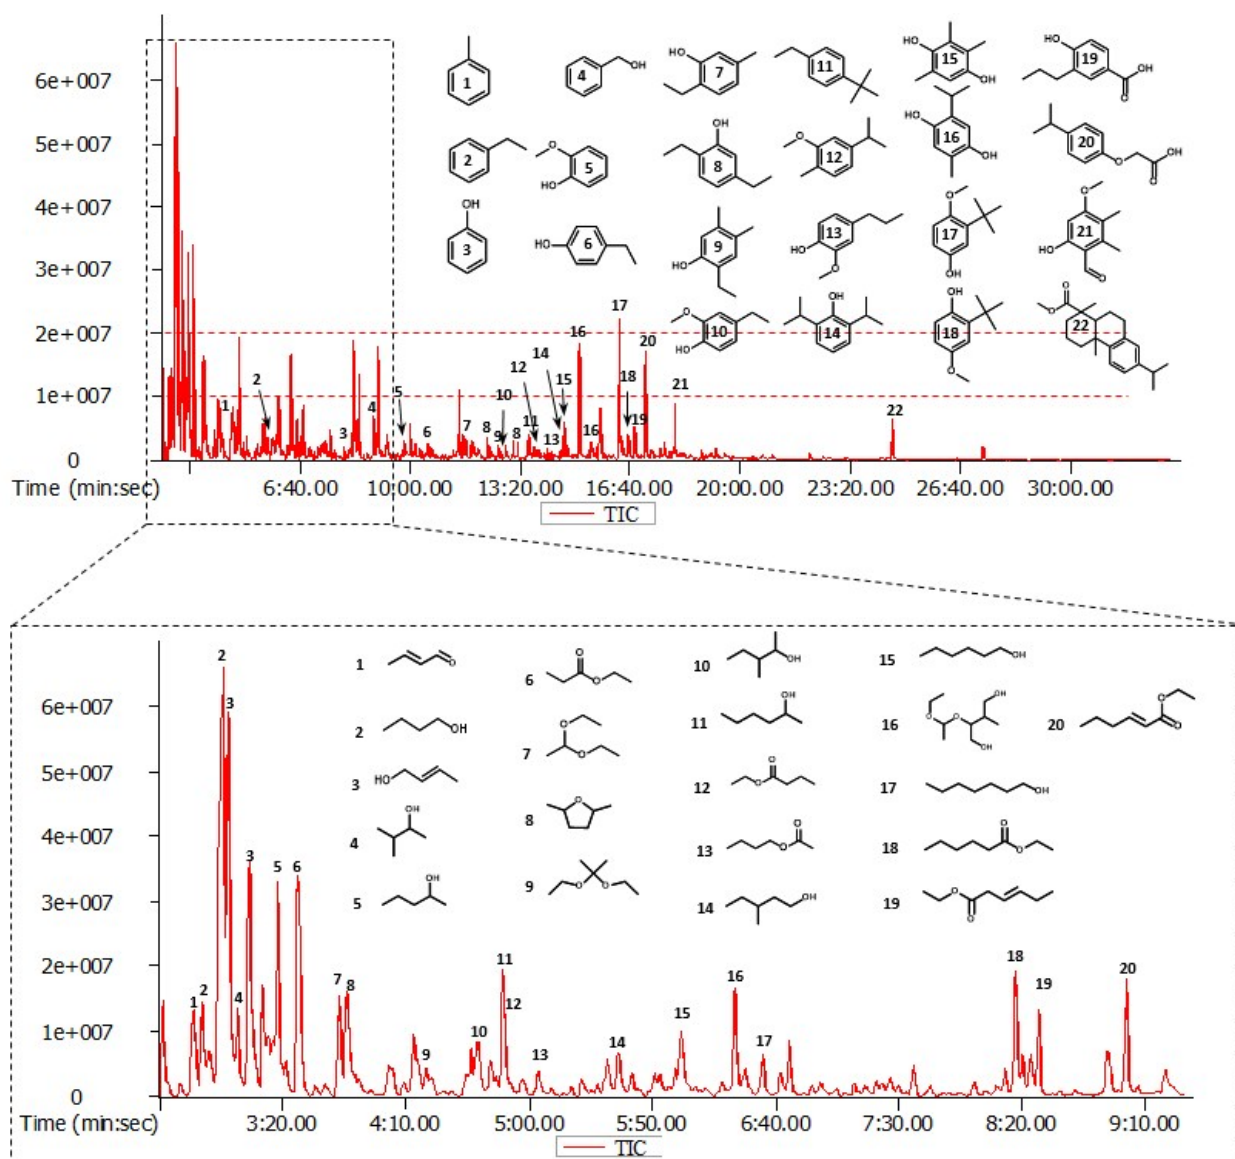

**Fig. S12** Gas chromatogram of the bio-oil collected immediately after the reaction in entry 7 in Table 1. Reaction condition: 3 g alkali lignin, 60 g ethanol, 12 g formic acid, 900 min, 350 °C, 29.3–44.9 MPa.



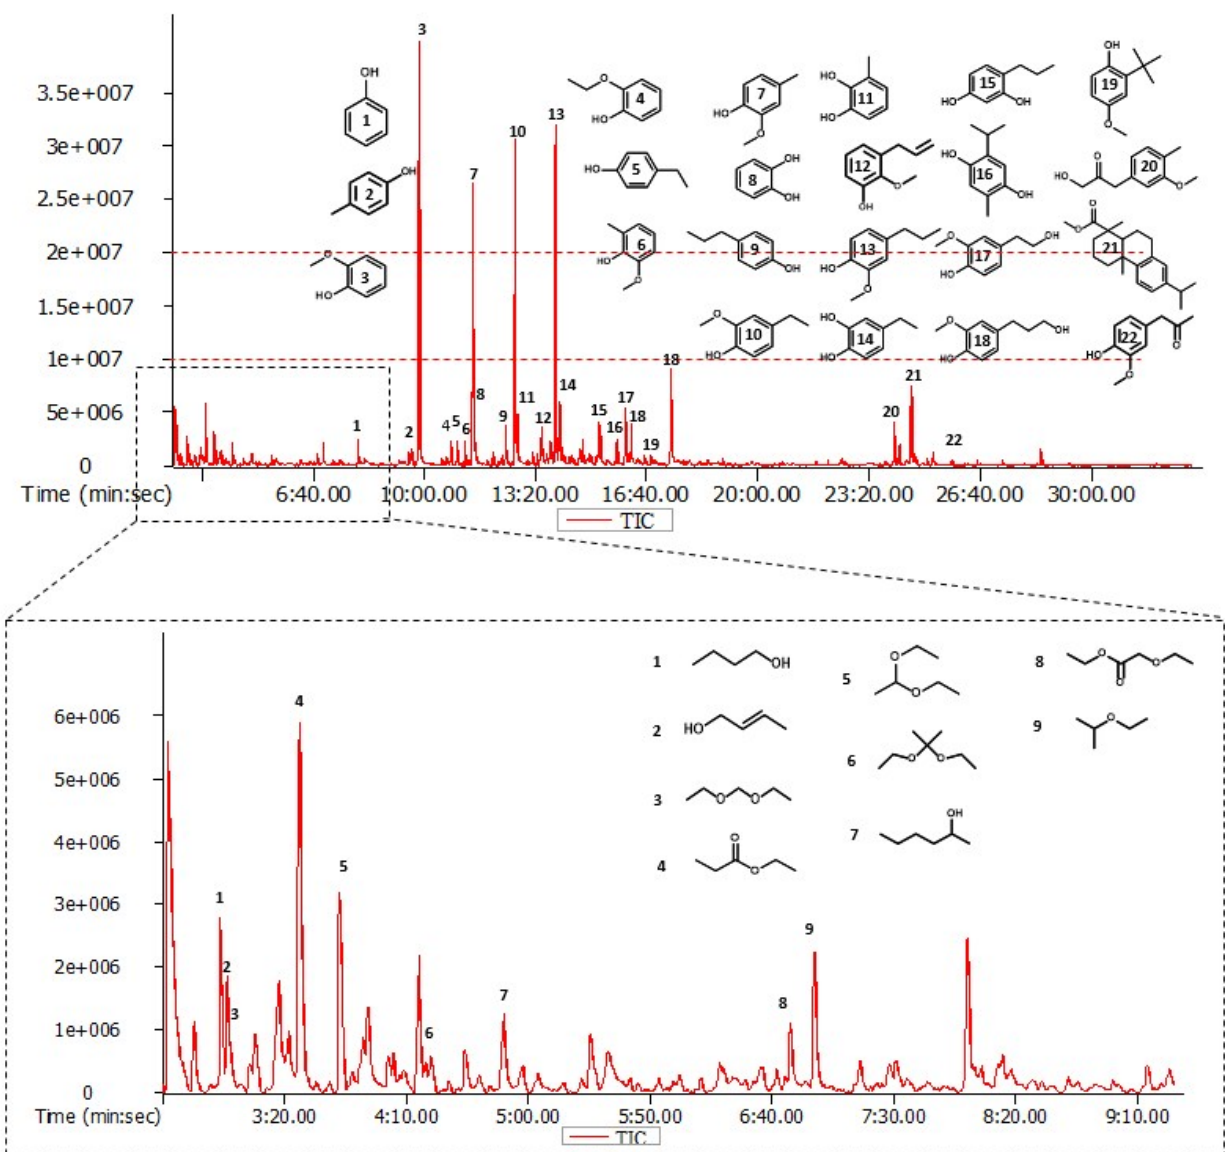

**Fig. S13** Gas chromatogram of the bio-oil collected immediately after the reaction in entry 8 in Table 1. Reaction condition: 6 g alkali lignin, 60 g ethanol, 12 g formic acid, 60 min, 350 °C, 30.8–41.7 MPa.

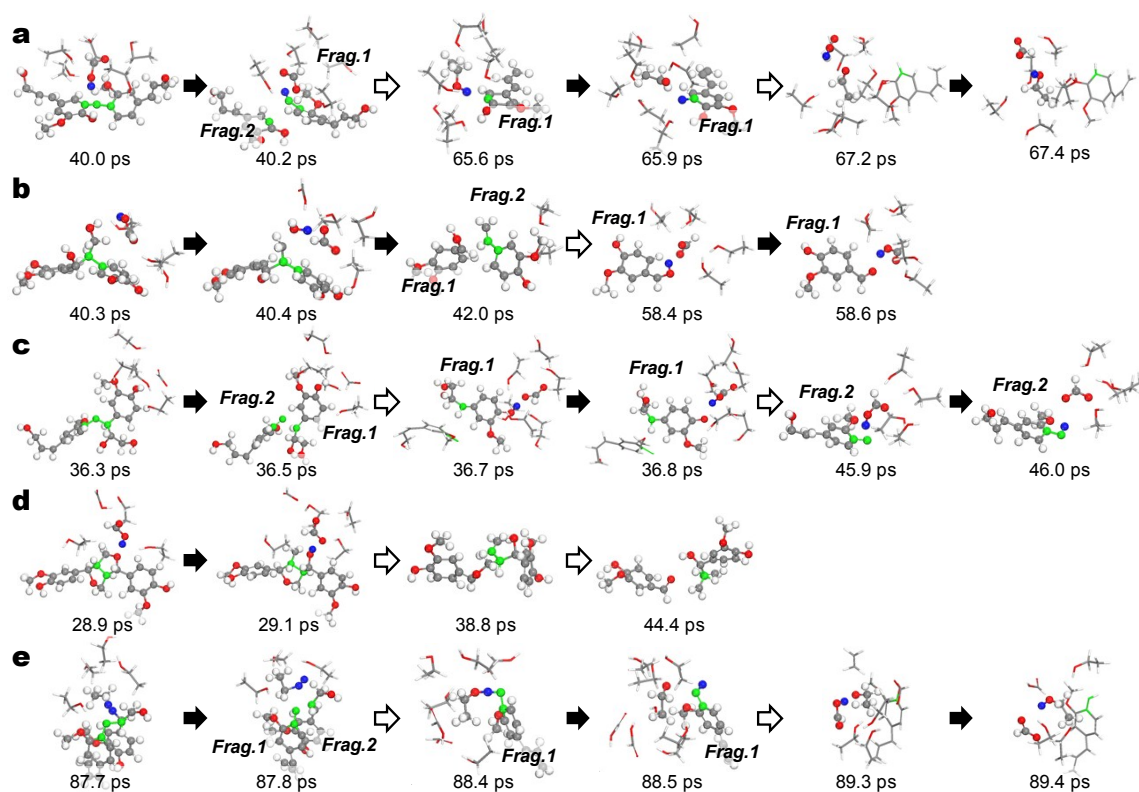

**Step-by-step decomposition mechanisms:** The lignin linkage was found to be spontaneously cleaved by hydrogen supplied by the solvent or by heat, and it was observed that the formed radical fragment was stabilized by receiving hydrogen from the solvent. A detailed description is given; **a** the 4-O-5 dilignol molecule initiated the dilignol depolymerization by the hydrogen decomposed at FA. This hydrogen bound to the central oxygen of the 4-O-5 dilignol molecule between 40.0 and 40.2 ps and broke the 4-O-5 bond to form two lignin molecules, Frag.1 and Frag.2. Among them, one radical lignin molecule (Frag.1) received hydrogen from adjacent other ethanol and became stable product at 65.9 ps. At this time, the decomposed ethanol brought hydrogen from neighboring FA and it was observed that ethanol was regenerated at 67.4 ps, **b** The depolymerization mechanism of  $\beta$ -1 dilignol molecule was initiated by the fact that the hydrogen decomposed in FA formed water by binding with OH around the  $\beta$ -1 linkage of the dilignol molecule at 40.4 ps. The alkyl chain in which  $H_2O$  was removed was transformed into a C=C bond in the form of a vinyl group, and the neighboring C-C ( $\alpha$ - $\beta$ ) bond was broken to form two lignin molecules of Frag.1 and Frag.2 at 42.0 ps. The radical lignin molecule (Frag.1) produced by the depolymerization reaction formed FA with an aldehyde group, providing hydrogen with adjacent HCOO (hydrogen free FA radical) at 58.6 ps, **c** the initiation of

depolymerization of  $\alpha$ -O-4 dilignol molecule was resulted from the dissociation of C-O bond by heat, forming two radical lignin molecules Frag.1 and Frag.2 at 36.5 ps. Frag.1 with carbon radicals was observed to transfer hydrogen of the phenol group to neighboring HCOO (FA-free radicals away from hydrogen) to form FA at 36.8 ps and Frag.2 with oxygen radicals received hydrogen transferred from FA around the oxygen to form stable lignin molecule at 46.0 ps, **d** it was confirmed that the depolymerization reaction of  $\beta$ - $\beta$  dilignol molecule was initiated by hydrogen separated from FA similarly to 4-O-5 and  $\beta$ -1 cases. At 29.1 ps, the hydrogen released from FA was bound to the oxygen of the tetrahydrofuran containing the  $\beta$ - $\beta$  bond, resulting in the ring opening due to the dissociation of the C-O bond. Similar to the dissociation of  $\beta$ -1, the radical carbon was transformed into vinyl, while the remaining C-C ( $\alpha$ - $\beta$ ) bond of the tetrahydrofuran was broken, resulting in a further ring opening at 38.8 ps. Finally, the C-O bond was broken and separated into two molecules at 44.4 ps, and **e** the depolymerization of  $\beta$ -O-4 dilignol molecule began with the break of the C-O bond by heat at 87.8 ps, similar to the depolymerization reaction of  $\alpha$ -O-4 linkage dilignol molecule. At this stage, however, radicals disappeared from the Frag.2 molecule as OH was transferred to the neighboring C<sub>2</sub>H<sub>5</sub> (i.e., decomposed ethanol). The remaining radical lignin molecule, Frag.1, was hydrolyzed to yield a stable product at 88.4 ps. It has been observed that the ethanol was regenerated by taking hydrogen from the neighboring FA at 89.4 ps.

## References

1. H. Kim and J. Ralph, *Org Biomol Chem*, 2010, **8**, 576-591.
2. Sally Ralph and John Ralph, *NMR database of lignin and cell wall Model Compounds*, Dairy Forage Research Center, 2009.
3. K. Schofield, *Prog. Energy Combust. Sci.*, 2008, **34**, 330-350.
4. M. J. Hidajat, A. Riaz and J. Kim, *Chem. Eng. J.*, 2018, **348**, 799-810.
